# Supplementary material for: An ATP–Cu(ii) catalyst efficiently catalyzes enantioselective Michael reactions in water
Source: Royal Society of Chemistry journal article supplement (doi:10.1039/d1gc03259c), 2021-01-01
Supplement: d1gc03259c1.pdf [file d1gc03259c1.pdf]

## Supplementary information

### **An ATP-Cu(II) catalyst efficiently catalyzes enantioselective Michael reactions in water**

Xingchen Dong,<sup>†a</sup> Zijian Yuan,<sup>†a</sup> Yao Qu,<sup>a</sup> Yuxin Gao,<sup>a</sup> Xue Pei,<sup>a</sup> Qianqian Qi,<sup>a</sup> Yujuan Pei,<sup>a</sup> Jiaqi Li,<sup>a</sup> Yashao Chen<sup>a</sup> and Changhao Wang<sup>\*ab</sup>

<sup>a</sup> Key Laboratory of Applied Surface and Colloid Chemistry, Ministry of Education, School of Chemistry and Chemical Engineering, Shaanxi Normal University, Xi'an, 710119, China.

E-mail: changhaowang@snnu.edu.cn

<sup>b</sup> Xi'an Key Laboratory of Organometallic Material Chemistry, Shaanxi Normal University, Xi'an, 710119, China.

<sup>†</sup>These authors contributed equally.

## Table of Contents

|                                                                                                                                |     |
|--------------------------------------------------------------------------------------------------------------------------------|-----|
| 1. General remarks.....                                                                                                        | S3  |
| 2. Tables S1-S6 .....                                                                                                          | S4  |
| 3. Figures S1-S4 .....                                                                                                         | S6  |
| 4. Determination of the absolute configuration of <b>3a</b> .....                                                              | S8  |
| 5. Detailed procedures of ATP·Cu <sup>2+</sup> catalyzed enantioselective Michael reactions in different reaction scales ..... | S9  |
| 6. References .....                                                                                                            | S11 |
| 7. NMR and HRMS data .....                                                                                                     | S12 |
| 8. HPLC traces .....                                                                                                           | S25 |

## 1. General remarks

Circular Dichroism (CD) spectra were measured on a Chirascan Circular Dichroism Spectrometer (Applied Photophysics Ltd, England, UK). The CD spectra were performed using a quartz cell (1 mm optical path length), an instrument scanning speed of 100 nm/min and were accumulated by taking the average of three scans made from 200 to 320 nm at 4 °C. Ultraviolet-visible (UV-Vis) spectra were collected by Agilent Cary 3500 in a sealed quartz cell with a path length of 1.0 cm. The enantioselective Michael reactions were analyzed by high performance liquid chromatography (HPLC, Shimadzu Prominence-*i* LC-2030) with chiral stationary phase using hexane and *iso*-propanol as eluents. Proton nuclear magnetic resonance (<sup>1</sup>H NMR) and carbon nuclear magnetic resonance (<sup>13</sup>C NMR) spectra were recorded on Bruker AV 400 MHz spectrometers using residue solvent peaks as an internal standard (<sup>1</sup>H NMR: CDCl<sub>3</sub> = 7.26, <sup>13</sup>C NMR: CDCl<sub>3</sub> = 77.16). Chemical shifts were reported in parts per million (ppm) with respect to the residual solvent signal. Peak multiplicities were reported as follows: s = singlet, m = multiplet, d = doublet, t = triplet, q = quartet, dd = doublet of doublets, td = triplet of doublets, dt = doublet of triplets. The coupling constant (*J*) were reported in hertz (Hz). High-resolution mass spectra (HRMS) were collected on a Bruker Maxis System.

ATP, UTP, GTP, CTP, dATP, ADP, AMP, 3',5'-Cyclic AMP and adenosine were purchased from Sangon (Shanghai, China). The substrates **2a-c**, metal salts and achiral ligands and buffers were purchased from Energy Chemical and J&K Scientific Ltd. The chemicals were used without further purification unless otherwise stated. Water used was distilled and deionized using a Milli-Q A10 water purification system. Compounds **1a-h** and racemates **3a-j** were prepared as the literatures reported<sup>1-3</sup>.

## 2. Tables S1-S6

**Table S1** Enantioselective Michael reactions catalyzed by ATP·Cu<sup>2+</sup> with different copper(II) salts.

| Entry <sup>a</sup> | Metal cofactor                    | Conversion (%) | ee (%) |
|--------------------|-----------------------------------|----------------|--------|
| 1                  | Cu(NO <sub>3</sub> ) <sub>2</sub> | 63             | 75     |
| 2                  | Cu(OTf) <sub>2</sub>              | 70             | 75     |
| 3                  | CuSO <sub>4</sub>                 | 58             | 75     |
| 4                  | CuCl <sub>2</sub>                 | 72             | 74     |

<sup>a</sup> Reaction conditions: **1a** (2 μmol), **2a** (200 μmol), ATP (250 μM), copper(II) salts (50 μM), MOPS (20 mM, pH 7.9), 4 °C, 72 h.

**Table S2** Enantioselective Michael reactions catalyzed by ATP·Cu<sup>2+</sup> with different molar ratios.

| Entry <sup>a</sup> | ATP/μM | Cu(OTf) <sub>2</sub> /μM | Conversion (%) | ee (%) |
|--------------------|--------|--------------------------|----------------|--------|
| 1                  | 250    | 0                        | 1              | 31     |
| 2                  | 250    | 25                       | 20             | 76     |
| 3                  | 250    | 50                       | 70             | 75     |
| 4                  | 250    | 100                      | 73             | 74     |
| 5                  | 250    | 250                      | 95             | 66     |
| 6                  | 250    | 500                      | 91             | 54     |

<sup>a</sup> Reaction conditions: **1a** (2 μmol), **2a** (200 μmol), ATP (250 μM), MOPS (20 mM, pH 7.9), 4 °C, 72 h.

**Table S3** Enantioselective Michael reactions catalyzed by ATP·Cu<sup>2+</sup> in different buffers.

| Entry <sup>a</sup> | Buffer | pH   | Conversion (%) | ee (%) |
|--------------------|--------|------|----------------|--------|
| 1                  | MOPS   | 7.4  | 48             | 74     |
| 2                  | MOPS   | 7.9  | 70             | 75     |
| 3                  | MOPS   | 9.0  | 83             | 74     |
| 4                  | CHES   | 8.0  | 70             | 75     |
| 5                  | CHES   | 9.0  | 89             | 74     |
| 6                  | CHES   | 9.5  | 96             | 74     |
| 7                  | CHES   | 10.0 | 94             | 70     |
| 8                  | Tris   | 7.4  | 4              | 60     |
| 9                  | PBS    | 7.4  | 28             | 68     |
| 10                 | MES    | 7.0  | 8              | 64     |

<sup>a</sup> Reaction conditions: **1a** (2 μmol), **2a** (200 μmol), ATP (250 μM), Cu(OTf)<sub>2</sub> (50 μM), 4 °C, 72 h.

**Table S4** ATP·Cu<sup>2+</sup> catalyzed Michael reactions of **1a** with different amount of **2a**.

| Entry <sup>a</sup> | Molar ratios of <b>1a/2a</b> | Conversion (%) | ee (%) |
|--------------------|------------------------------|----------------|--------|
| 1                  | 1:2                          | 16             | 72     |
| 2                  | 1:5                          | 34             | 72     |
| 3                  | 1:10                         | 58             | 73     |
| 4                  | 1:20                         | 78             | 74     |
| 5                  | 1:50                         | 90             | 74     |
| 6                  | 1:100                        | 97             | 74     |

<sup>a</sup> Reaction conditions: **1a** (2 μmol), **2a** (4-200 μmol), ATP (250 μM), Cu(OTf)<sub>2</sub> (50 μM), CHES (20mM, pH 9.5), 4 °C, 72 h.

**Table S5** Enantioselective Michael reactions catalyzed by ATP and different metal ions.

| Entry <sup>a</sup> | Metal cofactor       | Conversion (%) | ee (%) |
|--------------------|----------------------|----------------|--------|
| 1                  | Ag(OTf) <sub>2</sub> | 6              | < 3    |
| 2                  | Yb(OTf) <sub>3</sub> | 8              | < 3    |

<sup>a</sup> Reaction conditions: **1a** (2 μmol), **2a** (200 μmol), ATP (250 μM), metal cofactor (50 μM), CHES (20mM, pH 9.5), 4 °C, 72 h.

**Table S6** ATP·Cu<sup>2+</sup> catalyzed Michael reactions using different substrates in analytical scale.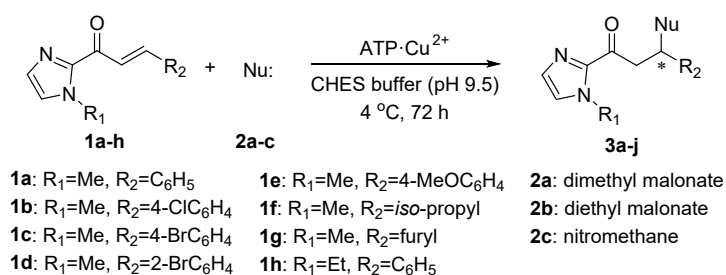

| Entry <sup>a</sup> | <b>1</b>  | <b>2</b>  | <b>3</b>  | Conversion (%) | ee (%) |
|--------------------|-----------|-----------|-----------|----------------|--------|
| 1                  | <b>1a</b> | <b>2a</b> | <b>3a</b> | 96             | 74     |
| 2 <sup>b</sup>     | <b>1b</b> | <b>2a</b> | <b>3b</b> | 70             | 77     |
| 3 <sup>b</sup>     | <b>1c</b> | <b>2a</b> | <b>3c</b> | 80             | 80     |
| 4 <sup>b</sup>     | <b>1d</b> | <b>2a</b> | <b>3d</b> | 64             | 41     |
| 5                  | <b>1e</b> | <b>2a</b> | <b>3e</b> | 83             | 80     |
| 6                  | <b>1f</b> | <b>2a</b> | <b>3f</b> | 44             | < 3    |
| 7                  | <b>1g</b> | <b>2a</b> | <b>3g</b> | 85             | 55     |
| 8                  | <b>1h</b> | <b>2a</b> | <b>3h</b> | 95             | 67     |
| 9                  | <b>1a</b> | <b>2b</b> | <b>3i</b> | 98             | 77     |
| 10                 | <b>1a</b> | <b>2c</b> | <b>3j</b> | 90             | 65     |

<sup>a</sup> Reaction conditions: **1** (2 μmol), **2** (200 μmol), ATP (250 μM), Cu(OTf)<sub>2</sub> (50 μM), CHES buffer (20 mM, pH 9.5), 4 °C, 72 h. The conversion of **1a** reacting with **2a** was calculated by HPLC analysis, while all other conversions of **1a-g** were determined by <sup>1</sup>H NMR. The ee values of **3a-j** were determined by chiral HPLC. All data were averaged by duplicated experiments with the reproducibility of ±5% conversion and ±3% ee. <sup>b</sup> Using ATP (1 mM) and Cu(OTf)<sub>2</sub> (200 μM).

### 3. Figures S1-S4

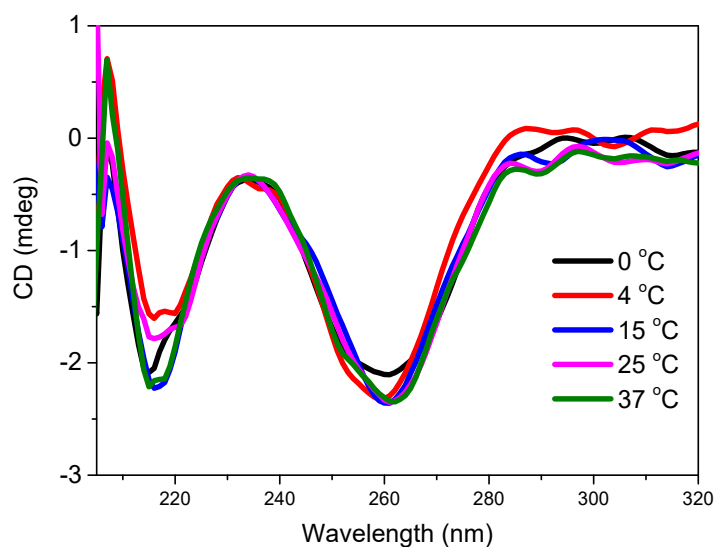

**Figure S1** CD spectra of ATP (250 μM) with Cu(OTf)<sub>2</sub> (50 μM) at different temperatures in CHES buffer (20 mM, pH 9.5).

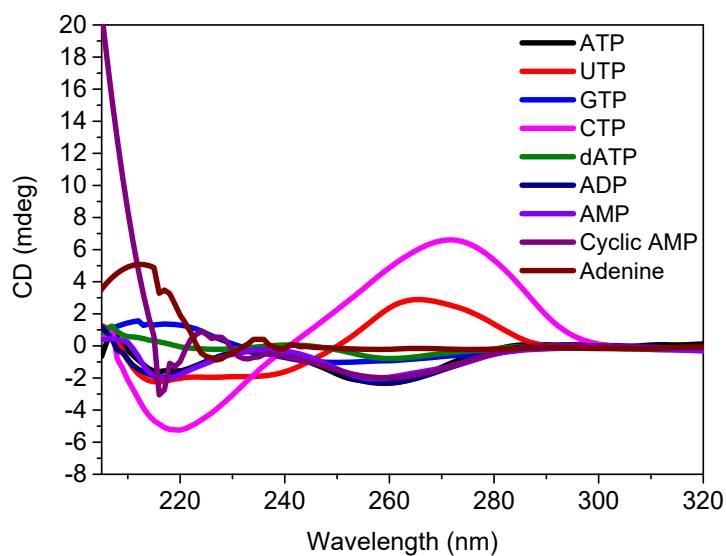

**Figure S2** CD spectra of different ATP analogues (250 μM) with Cu(OTf)<sub>2</sub> (50 μM) in CHES buffer (20 mM, pH 9.5).

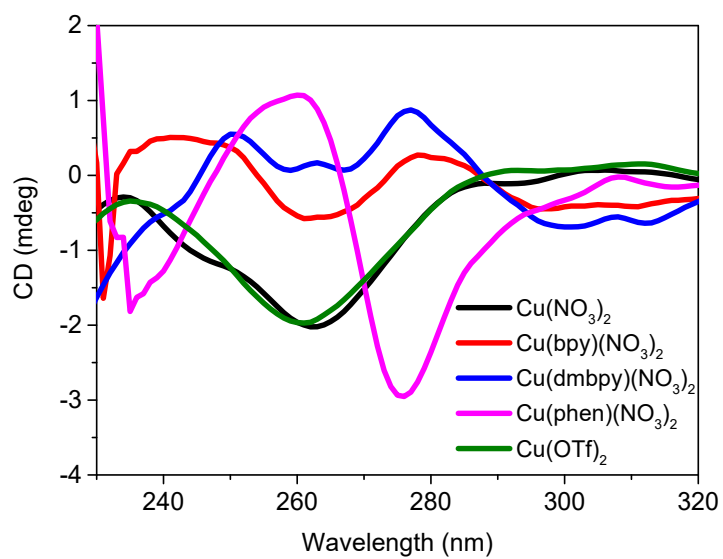

**Figure S3** CD spectra of ATP (250 μM) with different copper(II) cofactors (50 μM) in CHES buffer (20 mM, pH 9.5).

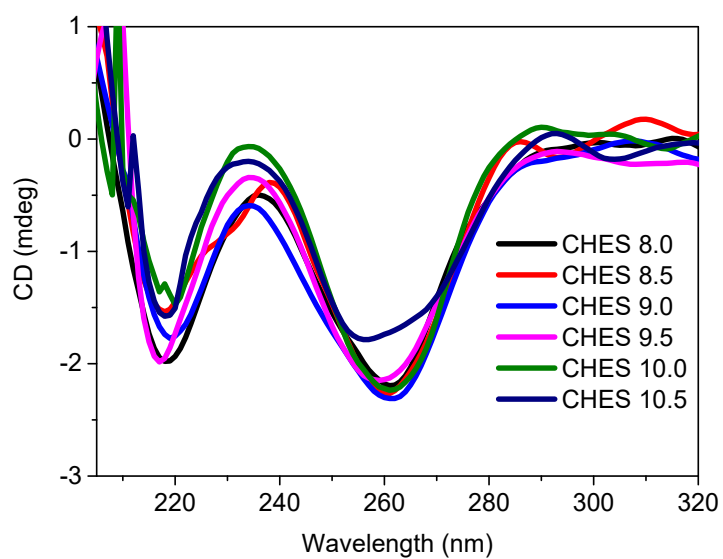

**Figure S4** CD spectra of ATP (250 μM) with  $\text{Cu}(\text{OTf})_2$  (50 μM) in different CHES buffers (20 mM).

#### 4. Determination of the absolute configuration of **3a**

For the ATP·Cu<sup>2+</sup> catalyzed enantioselective Michael reaction of **1a** and **2a**, the absolute configuration of the product **3a** was determined in comparison of the reported literature<sup>4</sup>. Roelfes et al. reported that the enantioselective Michael reaction of **1a** and **2a** was catalyzed by salmon testes DNA (st-DNA) and Cu(dmbpy)(NO<sub>3</sub>)<sub>2</sub>, yielding the chiral product **3a** at 96% ee in *R* configuration. The configuration of **3a** were assigned on the HPLC trace using Chiralpak AD column (hexane/*i*-PrOH = 80:20, 1.0 mL/min<sup>-1</sup>, 254 nm). Using the same HPLC condition and Chiralpak AD column, we analyzed the product **3a** that was obtained from the enantioselective Michael reaction of **1a** and **2a** catalyzed by ATP·Cu<sup>2+</sup>. By comparison to the reference, we determined that the major product **3a** generated by ATP·Cu<sup>2+</sup> was in *R* configuration.

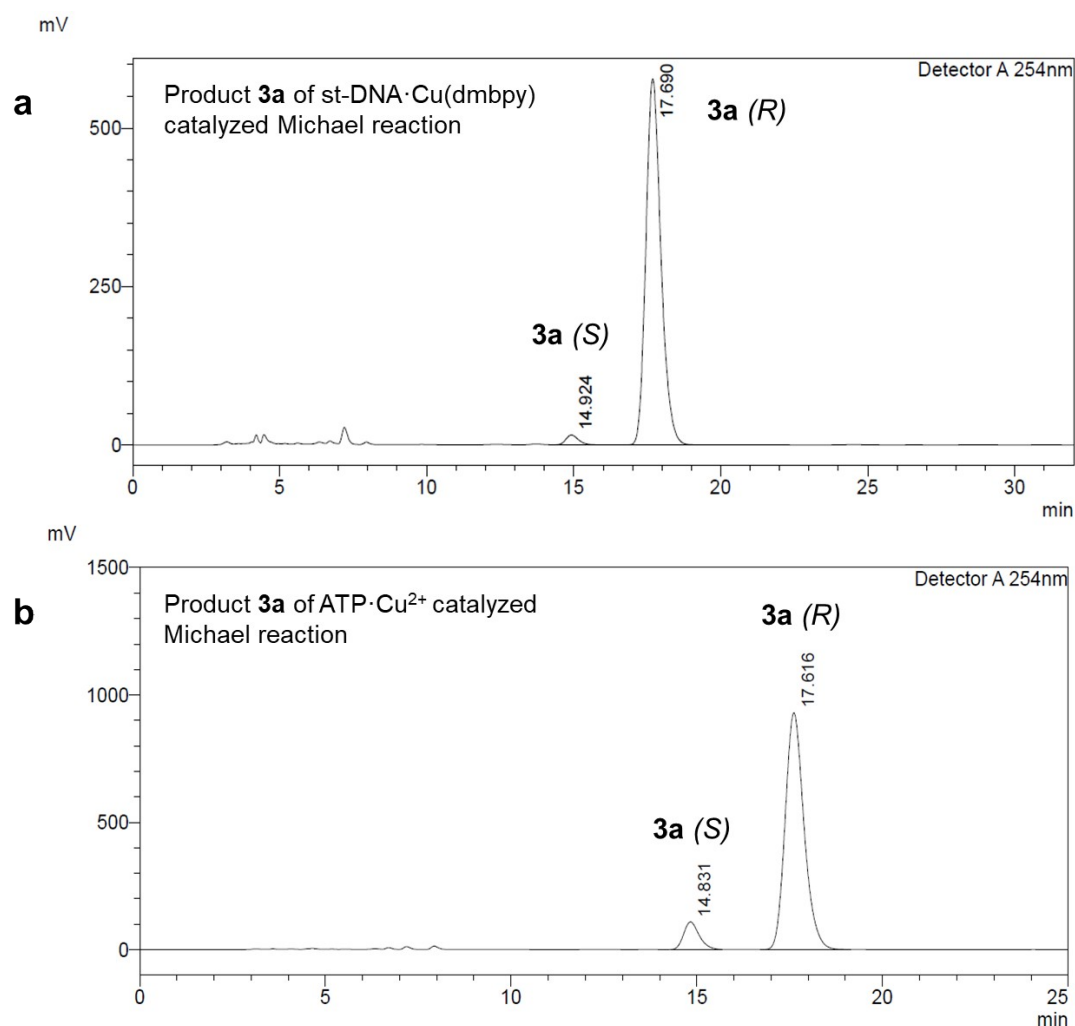

**Figure S5** HPLC traces of product of **3a** from the enantioselective Michael reaction catalyzed by (a) st-DNA/Cu(dmbpy) and (b) ATP·Cu<sup>2+</sup> using Chiralpak AD column. The major product **3a** generated by ATP·Cu<sup>2+</sup> is *R* configuration.



## 5. Detailed procedures of ATP·Cu<sup>2+</sup> catalyzed enantioselective Michael reactions in different reaction scales

### 5.1 Analytical scale

*Using enone 1 in a 2 μmol scale:* To a CHES buffer (2.0 mL, 20 mM, pH 9.5), an aqueous solution of ATP (final conc. 250 μM) was added. After stirred for twenty minutes at 4 °C, a solution of Cu(OTf)<sub>2</sub> (final conc. 50 μM) was added. After stirred for another twenty minutes at 4 °C. Then, the mixture of **1** in DMSO (20 μL of a 0.1 M solution) and nucleophile **2** (200 μmol, 100 eq.) were added. The above reaction media was stirred for 72 h followed by the extraction with ethyl acetate (3 × 2 mL) and removal of the solvent under reduced pressure. After a short flash chromatography, the residue was directly analyzed by chiral HPLC with the eluents of hexane and *iso*-propanol (*i*-PrOH), using a Daicel Chiralpak AD or ODH column column (250 × 4.6 mm). The conversion of **1a** was calculated by HPLC with a correction factor and the conversions of **1b-h** were estimated by <sup>1</sup>H NMR from the crude products.

The conversion of **1a** was calculated by the following equation as described in the literature<sup>3</sup>.

$$\text{Conversion of } \mathbf{1a} \text{ (\%)} = \frac{PA_{\mathbf{3a}}}{PA_{\mathbf{3a}} + PA_{\mathbf{1a}}/f}$$

Where  $PA_{\mathbf{1a}}$  and  $PA_{\mathbf{3a}}$  are the peak areas of **1a** and **3a**, respectively. And  $f$  is the correction factor determined to be 0.520 from a fitting curve (Figure S6).

*Using enone 1 in a 0.1 mmol scale:* In order to obtain the isolated yields of the Michael products **3a-j**, the ATP·Cu<sup>2+</sup> catalyzed enantioselective Michael reactions were carried out using enone **1** in a 0.1 mmol scale. The typical procedure is as follows: ATP (0.05 mmol) and Cu(OTf)<sub>2</sub> (0.01 mmol) was dissolved in a CHES buffer (15 mL, 20 mM, pH 9.5). After stirring for 30 min at 4 °C, a mixture of **1** (0.1 mmol) and **2** (5 mmol, 50 eq.) in DMSO (0.5 mL) were added. The mixture was stirred for 72 h followed by the extraction with ethyl acetate (2 × 10 mL). The combined organic fractions were dried by Na<sub>2</sub>SO<sub>4</sub> and concentrated under vacuum. The residue was purified by silica gel chromatography (petroleum ether:ethyl acetate = 6:1, v/v) and the isolated yields of **3a-j** were obtained. The enantioselectivities of pure **3a-j** were analyzed by chiral HPLC with the eluents of hexane and *i*-PrOH using Daicel Chiralpak AD or ODH column (250 × 4.6 mm).

### 5.2 Preparative scale

*Using enone 1 in a 0.5 mmol scale:* To a CHES buffer (60 mL, 20 mM, pH 9.5) in a round-bottom flask, ATP (0.5 mmol) and Cu(OTf)<sub>2</sub> (0.1 mmol) were added. After stirring for 30 min at 4 °C, a mixture of **1** (0.5 mmol, **1a** = 106 mg, **1c** = 145 mg, **1e** = 121 mg) and **2a** (25 mmol, 50 eq.) in DMSO (1.2 mL) were added. The reaction was stirred for 72 h and monitored by TLC, followed by the extraction with ethyl acetate (2 × 30 mL). The combined organic fractions were dried by Na<sub>2</sub>SO<sub>4</sub> and concentrated under reduced pressure. The crude products of **3a**, **3c** and **3e** were purified by silica gel chromatography using petroleum ether and ethyl acetate as eluents with a volume ratio of 6:1. The enantioselectivities of **3a**, **3c** and **3e** were analyzed by chiral HPLC with the eluents of hexane and *i*-PrOH, using Daicel Chiralpak AD column (250 × 4.6 mm).

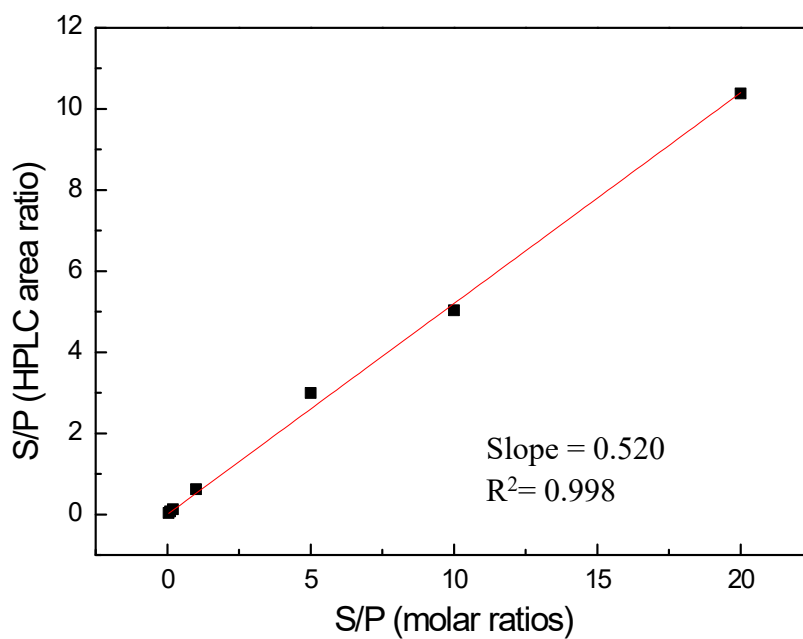

**Figure S6** Determination of the correction factor between **1a** and **3a** on HPLC. The HPLC ratios of peak areas ( $PA_{1a}/PA_{3a}$ ) were determined with the standard molar ratios ( $n_{1a}/n_{3a}$ ) of 1/20, 1/10, 1/5, 1, 5, 10, 20. The correction factor ( $f = 0.520$ ) was estimated from the fitting curve ( $R^2 = 0.998$ ).

## 6. References

1. C. Wang, G. Jia, Y. Li, S. Zhang and C. Li, *Chem. Commun.*, 2013, **49**, 11161-11163.
2. Y. Li, C. Wang, G. Jia, S. Lu and C. Li, *Tetrahedron*, 2013, **69**, 6585-6590.
3. C. Wang, M. Hao, Q. Qi, J. Dang, X. Dong, S. Lv, L. Xiong, H. Gao, G. Jia, Y. Chen, J. S. Hartig and C. Li, *Angew. Chem. Int. Ed.*, 2020, **59**, 3444-3449.
4. D. Coquière, B. L. Feringa and G. Roelfes, *Angew. Chem. Int. Ed.*, 2007, **46**, 9308-9311.

## 7. NMR and HRMS data

### 2-[3-(1-Methyl-1H-imidazol-2-yl)-3-oxo-1-phenyl-propyl]-malonic acid dimethyl ester (3a).

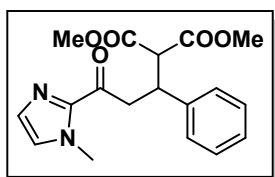

White solid (94% yield),  $R_f = 0.2$  (petroleum ether: ethyl acetate = 3:1).  $^1\text{H}$  NMR (400 MHz,  $\text{CDCl}_3$ )  $\delta$  7.31 – 7.28 (m, 2H), 7.22 (d,  $J = 13.1$  Hz, 2H), 7.17 – 7.15 (m, 1H), 7.12 (s, 1H), 6.97 (s, 1H), 4.14 (td,  $J = 10.0, 4.3$  Hz, 1H), 3.91 – 3.80 (m, 5H), 3.71 (s, 3H), 3.50 (dd,  $J = 17.5, 4.4$  Hz, 1H), 3.43 (s, 3H).  $^{13}\text{C}$  NMR (100 MHz,  $\text{CDCl}_3$ )  $\delta$  189.61 (s), 168.63 (s), 168.18 (s), 142.78 (s), 140.49 (s), 128.91 (s), 128.41 (d,  $J = 13.1$  Hz), 127.33 – 127.21 (m), 127.08 (d,  $J = 21.6$  Hz), 57.70 (s), 52.82 (s), 52.47 (s), 42.89 (s), 40.33 (s), 36.22 (s). HRMS (ESI) calcd. For  $[\text{C}_{18}\text{H}_{20}\text{N}_2\text{O}_5] \cdot \text{Na}^+$  ( $\text{M}+\text{Na}$ ) $^+$ :  $m/z$  367.1264, found 367.1263.

### 2-[1-(4-Chloro-phenyl)-3-(1-methyl-1H-imidazol-2-yl)-3-oxo-propyl]-malonic acid dimethyl ester (3b).

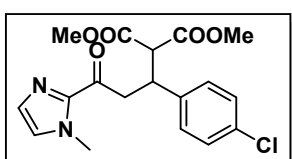

White solid (59% yield),  $R_f = 0.25$  (petroleum ether: ethyl acetate = 2:1).  $^1\text{H}$  NMR (600 MHz,  $\text{CDCl}_3$ )  $\delta$  7.22 (dd,  $J = 22.8, 8.5$  Hz, 4H), 7.08 (s, 1H), 6.96 (s, 1H), 4.15 – 4.11 (m, 1H), 3.86 (s, 3H), 3.84 – 3.76 (m, 2H), 3.71 (s, 3H), 3.48 (s, 3H), 3.41 (dd,  $J = 17.5, 4.3$  Hz, 1H).  $^{13}\text{C}$  NMR (100 MHz,  $\text{CDCl}_3$ )  $\delta$  189.37 (s), 168.30 (s), 167.90 (s), 142.75 (s), 139.05 (s), 132.83 (s), 129.74 (s), 129.04 (s), 128.53 (s), 127.02 (s), 57.34 (s), 52.73 (s), 52.43 (s), 42.61 (s), 39.75 (s), 36.03 (s). HRMS (ESI) calcd. For  $[\text{C}_{18}\text{H}_{19}\text{N}_2\text{O}_5\text{Cl}] \cdot \text{H}^+$  ( $\text{M}+\text{H}$ ) $^+$ :  $m/z$  379.1055, found 379.1052.

### 2-[1-(4-Bromo-phenyl)-3-(1-methyl-1H-imidazol-2-yl)-3-oxo-propyl]-malonic acid dimethyl ester (3c).

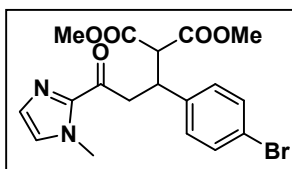

White solid (63% yield),  $R_f = 0.2$  (petroleum ether: ethyl acetate = 2:1).  $^1\text{H}$  NMR (400 MHz,  $\text{CDCl}_3$ )  $\delta$  7.18 (q,  $J = 8.5$  Hz, 4H), 7.03 (s, 1H), 6.93 (s, 1H), 4.09 (td,  $J = 10.1, 4.3$  Hz, 1H), 3.82 (s, 3H), 3.79 – 3.67 (m, 2H), 3.67 (s, 3H), 3.44 (s, 3H), 3.37 (dd,  $J = 17.5, 4.2$  Hz, 1H).  $^{13}\text{C}$  NMR (100 MHz,  $\text{CDCl}_3$ )  $\delta$  189.38 (s), 168.36 (s), 167.96 (s), 139.63 (s), 131.56 (s), 130.18 (s), 129.08 (s), 127.11 (s), 121.08 (s), 57.33 (s), 52.84 (s), 52.55 (s), 42.63 (s), 39.85 (s), 36.15 (s). HRMS (ESI) calcd. For  $[\text{C}_{18}\text{H}_{19}\text{N}_2\text{O}_5\text{Br}] \cdot \text{Na}^+$  ( $\text{M}+\text{Na}$ ) $^+$ :  $m/z$  445.0370, found 445.0363.

### 2-[1-(3-Bromo-phenyl)-3-(1-methyl-1H-imidazol-2-yl)-3-oxo-propyl]-malonic acid dimethyl ester (3d).

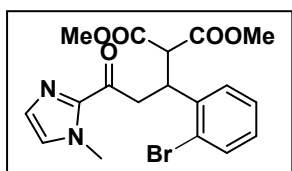

White solid (51% yield),  $R_f = 0.2$  (petroleum ether: ethyl acetate = 2:1).  $^1\text{H}$  NMR (600 MHz,  $\text{CDCl}_3$ )  $\delta$  7.43 (s, 1H), 7.29 (d,  $J = 7.9$  Hz, 1H), 7.24 (d,  $J = 7.8$  Hz, 1H), 7.10 (dd,  $J = 15.3, 7.5$  Hz, 2H), 6.96 (s, 1H), 4.12 (td,  $J = 9.9, 4.4$  Hz, 1H), 3.86 (d,  $J = 14.3$  Hz, 3H), 3.78 (dd,  $J = 17.6, 9.7$  Hz, 2H), 3.71 (s, 3H), 3.50 – 3.44 (m, 4H).  $^{13}\text{C}$  NMR (100 MHz,  $\text{CDCl}_3$ )  $\delta$  189.27 (s), 168.24 (s), 167.83 (s), 142.98 (s), 131.41 (s), 130.27 (s), 129.90 (s), 129.09 (s), 127.02 (d,  $J = 8.3$  Hz), 122.32 (s), 57.27 (s), 52.70 (s), 52.42 (s), 42.52 (s), 39.96 (s), 36.00 (s). HRMS (ESI) calcd. For  $[\text{C}_{18}\text{H}_{19}\text{N}_2\text{O}_5\text{Br}] \cdot \text{Na}^+$  ( $\text{M}+\text{Na}$ ) $^+$ :  $m/z$  445.0370, found 445.0376.

**2-[1-(4-Methoxy-phenyl)-3-(1-methyl-1H-imidazol-2-yl)-3-oxo-propyl]-malonic acid dimethyl ester**

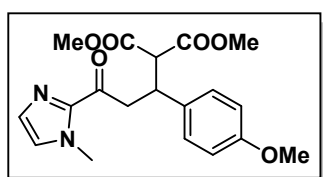

(3e). White solid (80% yield),  $R_f = 0.15$  (petroleum ether: ethyl acetate = 3:1).  $^1\text{H NMR}$  (400 MHz,  $\text{CDCl}_3$ )  $\delta$  7.20 – 7.16 (m, 2H), 7.04 (d,  $J = 0.8$  Hz, 1H), 6.92 (s, 1H), 6.75 – 6.72 (m, 2H), 4.08 (td,  $J = 10.0, 4.3$  Hz, 1H), 3.82 (d,  $J = 3.8$  Hz, 3H), 3.76 (dd,  $J = 20.0, 9.0$  Hz, 2H), 3.69 (d,  $J = 6.9$  Hz, 6H), 3.44 (s, 3H), 3.38 (dd,  $J = 17.4, 4.3$  Hz, 1H).  $^{13}\text{C NMR}$  (100 MHz,  $\text{CDCl}_3$ )  $\delta$  189.83 (s), 168.65 (s), 168.21 (s), 158.49 (s), 142.95 (s), 132.47 (s), 129.35 (s), 128.99 (s), 126.95 (s), 113.76 (s), 57.85 (s), 55.17 (s), 52.69 (s), 52.40 (s), 42.94 (s), 39.68 (s), 36.09 (s). HRMS (ESI) calcd. For  $[\text{C}_{19}\text{H}_{22}\text{N}_2\text{O}_6]\cdot\text{Na}^+$  ( $\text{M}+\text{Na}$ ) $^+$ :  $m/z$  397.1370, found 397.1363.

**2-[2-Methyl-1-[2-(1-methyl-1H-imidazol-2-yl)-2-oxo-ethyl]-propyl]-malonic acid dimethyl ester (3f).**

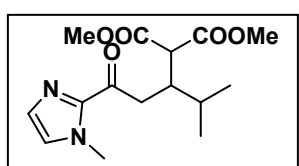

White solid (37% yield),  $R_f = 0.2$  (petroleum ether: ethyl acetate = 3:1).  $^1\text{H NMR}$  (400 MHz,  $\text{CDCl}_3$ )  $\delta$  7.11 (s, 1H), 7.00 (s, 1H), 3.98 (s, 3H), 3.71 (s, 3H), 3.60 (d,  $J = 6.7$  Hz, 4H), 3.23 (t,  $J = 5.8$  Hz, 2H), 2.93 - 2.89 (m, 1H), 0.94 (d,  $J = 6.8$  Hz, 3H), 0.86 (d,  $J = 6.8$  Hz, 3H).  $^{13}\text{C NMR}$  (100 MHz,  $\text{CDCl}_3$ )  $\delta$  191.50 (s), 169.61 (s), 169.41 (s), 143.06 (s), 128.96 (s), 126.93 (s), 54.37 (s), 52.48 (d,  $J = 13.3$  Hz), 38.98 (s), 37.65 (s), 36.25 (s), 30.16 (s), 20.89 (s), 18.15 (s). HRMS (ESI) calcd. For  $[\text{C}_{15}\text{H}_{22}\text{N}_2\text{O}_5]\cdot\text{Na}^+$  ( $\text{M}+\text{Na}$ ) $^+$ :  $m/z$  333.1421, found 333.1429.

**2-[1-Furan-2-yl-3-(1-methyl-1H-imidazol-2-yl)-3-oxo-propyl]-malonic acid dimethyl ester (3g).**

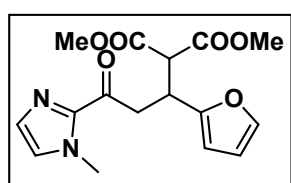

Yellow oil (95% yield),  $R_f = 0.2$  (petroleum ether: ethyl acetate = 2:1).  $^1\text{H NMR}$  (400 MHz,  $\text{CDCl}_3$ )  $\delta$  7.23 (d,  $J = 2.0$  Hz, 1H), 7.08 (s, 1H), 6.98 (s, 1H), 6.19 – 6.17 (m, 1H), 6.10 (d,  $J = 3.2$  Hz, 1H), 4.25 (td,  $J = 9.2, 4.4$  Hz, 1H), 3.90 (s, 3H), 3.82 (dd,  $J = 19.2, 9.1$  Hz, 2H), 3.68 (s, 3H), 3.58 (s, 3H), 3.41 (dd,  $J = 17.7, 4.4$  Hz, 1H).  $^{13}\text{C NMR}$  (100 MHz,  $\text{CDCl}_3$ )  $\delta$  189.49 (s), 168.25 (d,  $J = 7.6$  Hz), 153.62 (s), 142.73 (s), 141.78 (s), 129.12 (s), 127.07 (s), 110.25 (s), 107.00 (s), 55.27 (s), 52.70 (d,  $J = 8.5$  Hz), 40.35 (s), 36.18 (s), 34.01 (s). HRMS (ESI) calcd. For  $[\text{C}_{16}\text{H}_{18}\text{N}_2\text{O}_6]\cdot\text{Na}^+$  ( $\text{M}+\text{Na}$ ) $^+$ :  $m/z$  357.1057, found 357.1055.

**2-[3-(1-Ethyl-1H-imidazol-2-yl)-3-oxo-1-phenyl-propyl]-malonic acid dimethyl ester (3h).**

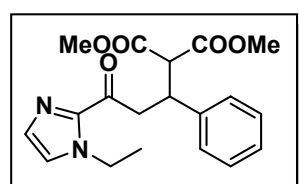

White solid (90% yield),  $R_f = 0.25$  (petroleum ether: ethyl acetate = 3:1).  $^1\text{H NMR}$  (400 MHz,  $\text{CDCl}_3$ )  $\delta$  7.30 - 7.28 (m, 2H), 7.25 – 7.21 (m, 2H), 7.16 – 7.12 (m, 1H), 7.09 (s, 1H), 7.02 (s, 1H), 4.34 - 4.24 (m, 2H), 4.18 (td,  $J = 10.0, 4.6$  Hz, 1H), 3.87 – 3.80 (m, 2H), 3.72 (s, 3H), 3.51 - 3.46 (m, 1H), 3.45 (s, 3H), 1.26 (t,  $J = 7.2$  Hz, 3H).  $^{13}\text{C NMR}$  (100 MHz,  $\text{CDCl}_3$ )  $\delta$  189.50 (s), 168.50 (s), 168.06 (s), 142.25 (s), 140.46 (s), 129.14 (s), 128.27 (d,  $J = 4.0$  Hz), 127.01 (s), 125.12 (s), 57.63 (s), 52.59 (s), 52.25 (s), 43.57 (s), 42.90 (s), 40.51 (s), 16.20 (s). HRMS (ESI) calcd. For  $[\text{C}_{19}\text{H}_{22}\text{N}_2\text{O}_5]\cdot\text{Na}^+$  ( $\text{M}+\text{Na}$ ) $^+$ :  $m/z$  381.1434, found 381.1431.

**2-[3-(1-Methyl-1H-imidazol-2-yl)-3-oxo-1-phenyl-propyl]-malonic acid diethyl ester (3i).**

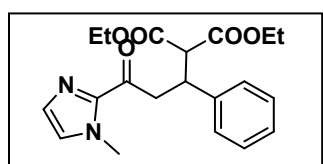

White solid (91% yield),  $R_f = 0.3$  (petroleum ether: ethyl acetate = 3:1).  $^1\text{H}$  NMR (400 MHz,  $\text{CDCl}_3$ )  $\delta$  7.30 – 7.13 (m, 5H), 7.06 (d,  $J = 0.6$  Hz, 1H), 6.93 (s, 1H), 4.19 – 4.11 (m, 3H), 3.90 – 3.74 (m, 7H), 3.44 (dd,  $J = 17.4, 4.1$  Hz, 1H), 1.22 (t,  $J = 7.2$  Hz, 3H), 0.94 (t,  $J = 7.1$  Hz, 3H).  $^{13}\text{C}$  NMR (100 MHz,  $\text{CDCl}_3$ )  $\delta$  189.73 (s), 168.22 (s), 167.79 (s), 142.89 (s), 140.66 (s), 128.71 (d,  $J = 33.0$  Hz), 128.34 (s), 126.97 (d,  $J = 18.4$  Hz), 61.71 (s), 61.31 (s), 57.90 (s), 43.19 (s), 40.35 (s), 36.12 (s), 14.11 (s), 13.80 (s). HRMS (ESI) calcd. For  $[\text{C}_{20}\text{H}_{24}\text{N}_2\text{O}_5]\cdot\text{Na}^+$  ( $\text{M}+\text{Na}$ ) $^+$ :  $m/z$  395.1577, found 395.1571.

**1-(1-Methyl-1H-imidazol-2-yl)-4-nitro-3-phenyl-butan-1-one (3j).** White solid (89% yield),  $R_f = 0.25$  (petroleum ether: ethyl acetate = 3:1).  $^1\text{H}$  NMR (400 MHz,  $\text{CDCl}_3$ )  $\delta$  7.30 (d,  $J = 5.3$  Hz, 4H), 7.25 – 7.21 (m, 1H), 7.14 (s, 1H), 7.02 (s, 1H), 4.73 (dd,  $J = 12.7, 6.9$  Hz, 1H), 4.63 (dd,  $J = 12.4, 8.2$  Hz, 1H), 4.24 – 4.15 (m, 1H), 3.93 (s, 3H), 3.74 (dd,  $J = 17.4, 7.3$  Hz, 1H), 3.53 (dd,  $J = 17.5, 7.2$  Hz, 1H).  $^{13}\text{C}$  NMR (100 MHz,  $\text{CDCl}_3$ )  $\delta$  189.14 (s), 139.03 (s), 129.29 (s), 128.96 (s), 127.68 (d,  $J = 19.8$  Hz), 79.91 (s), 41.90 (s), 39.33 (s), 36.12 (s), 29.70 (s). HRMS (ESI) calcd. For  $[\text{C}_{14}\text{H}_{15}\text{N}_3\text{O}_3]\cdot\text{Na}^+$  ( $\text{M}+\text{Na}$ ) $^+$ :  $m/z$  296.1006, found 296.1001.

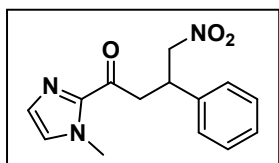

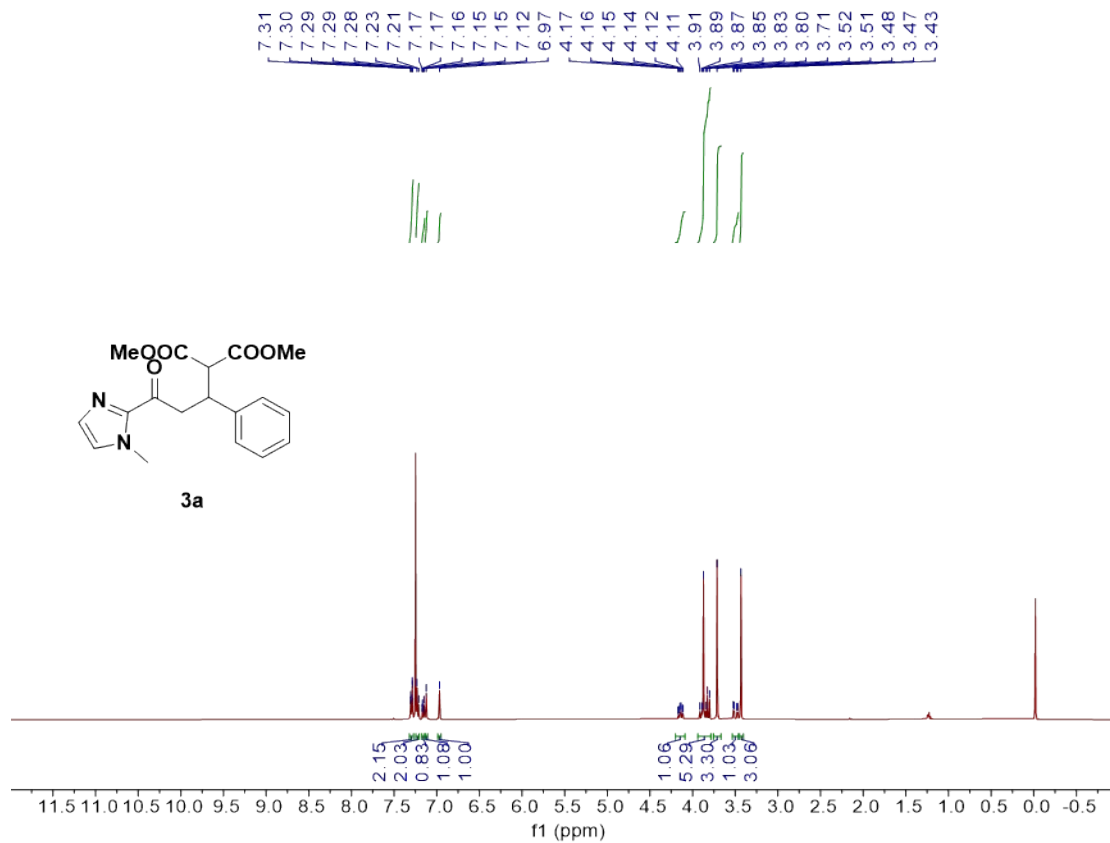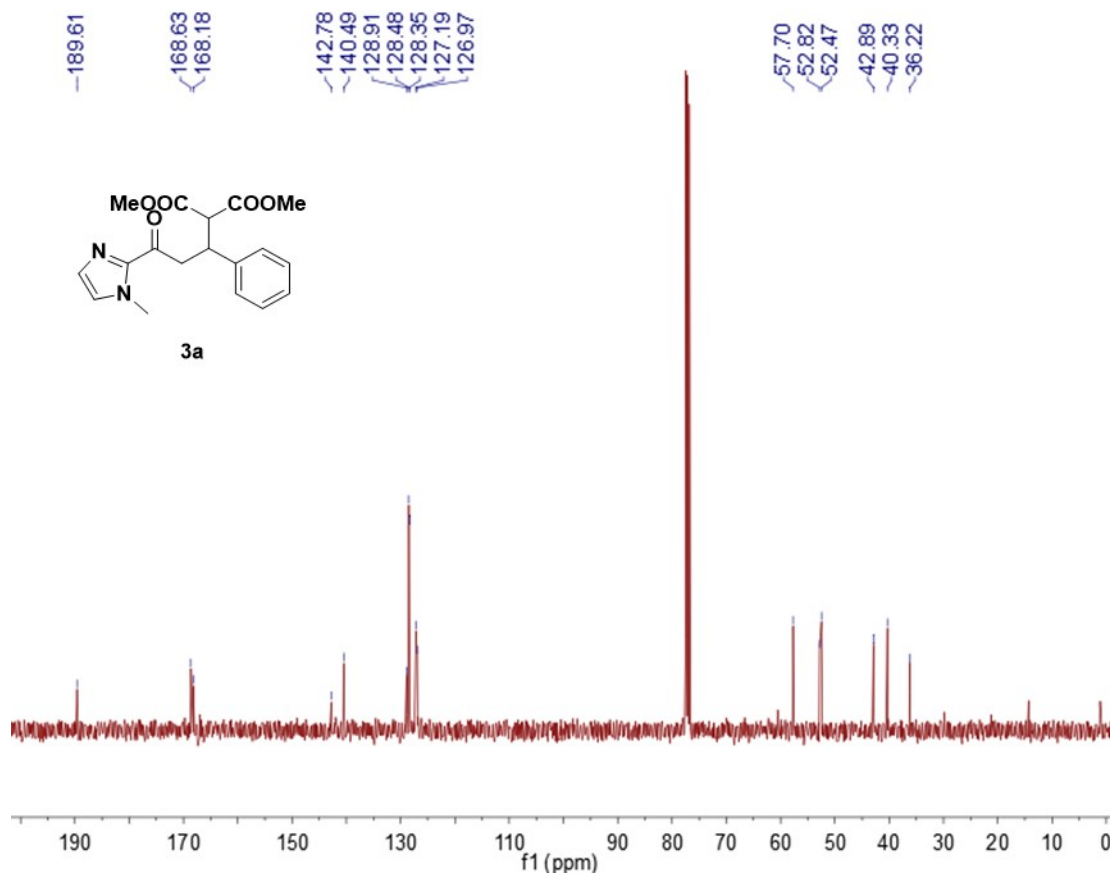

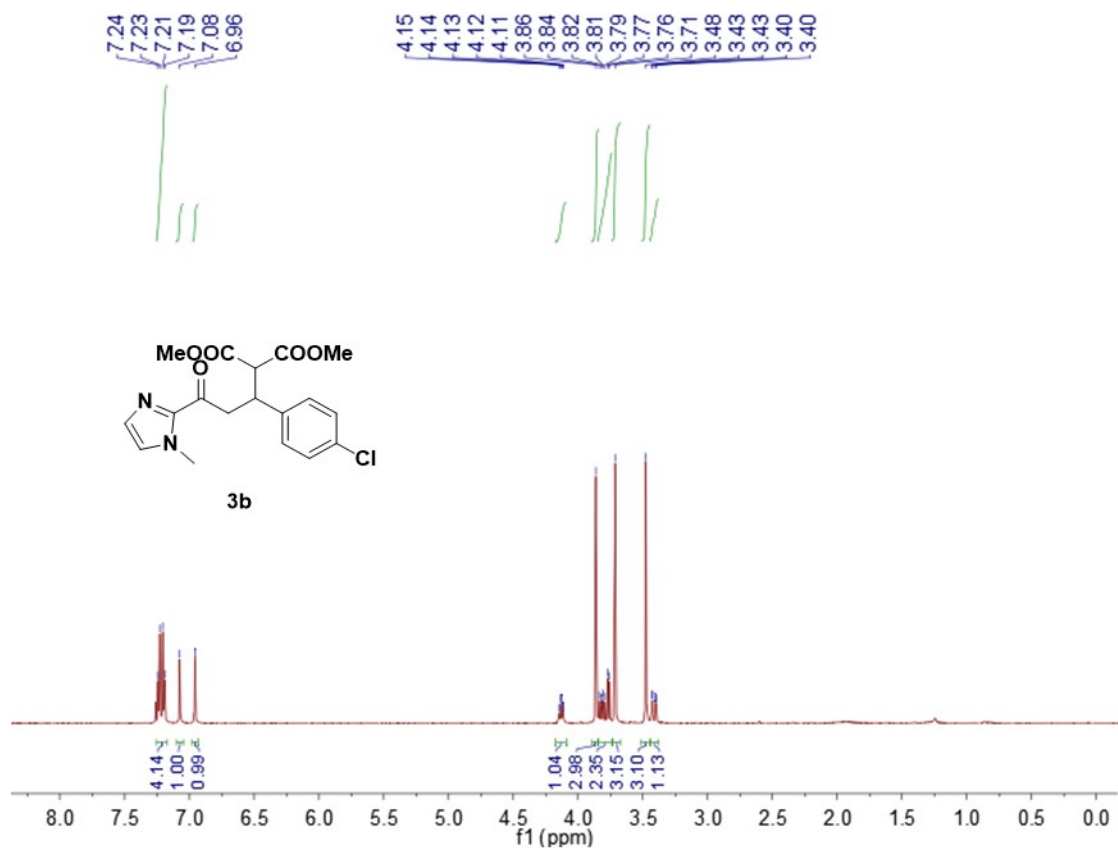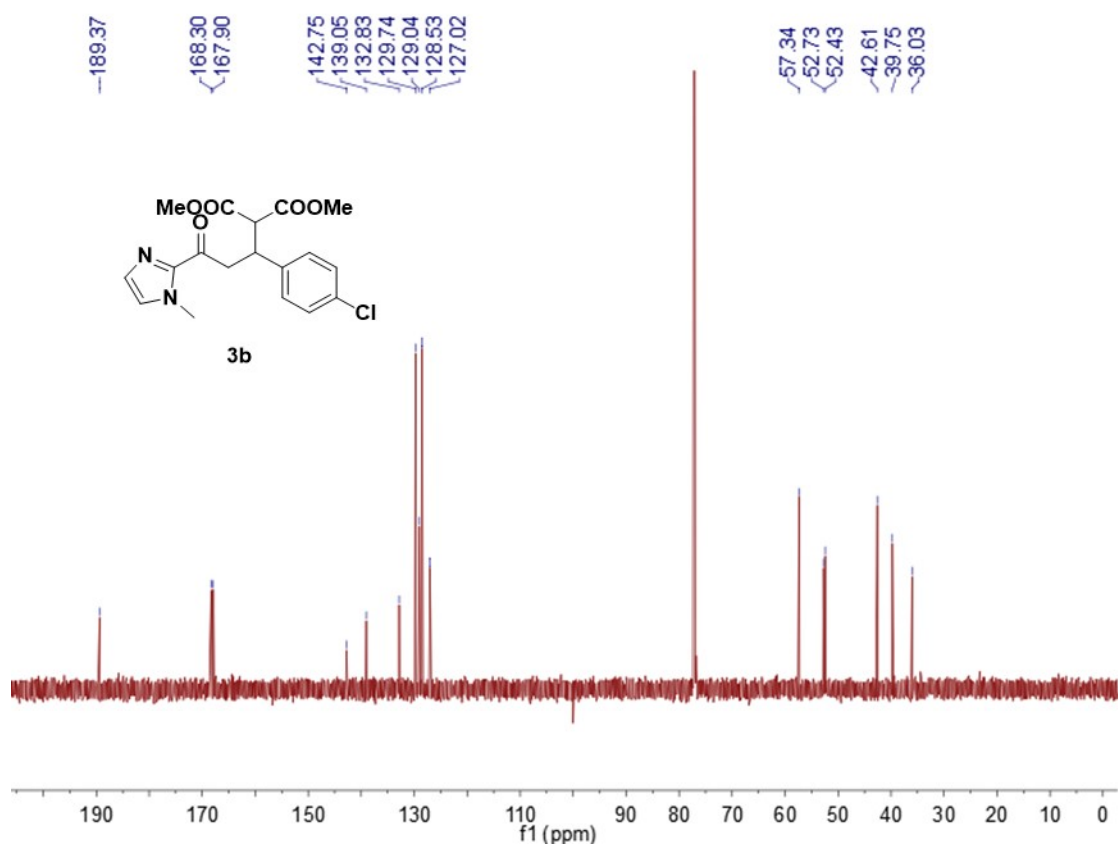



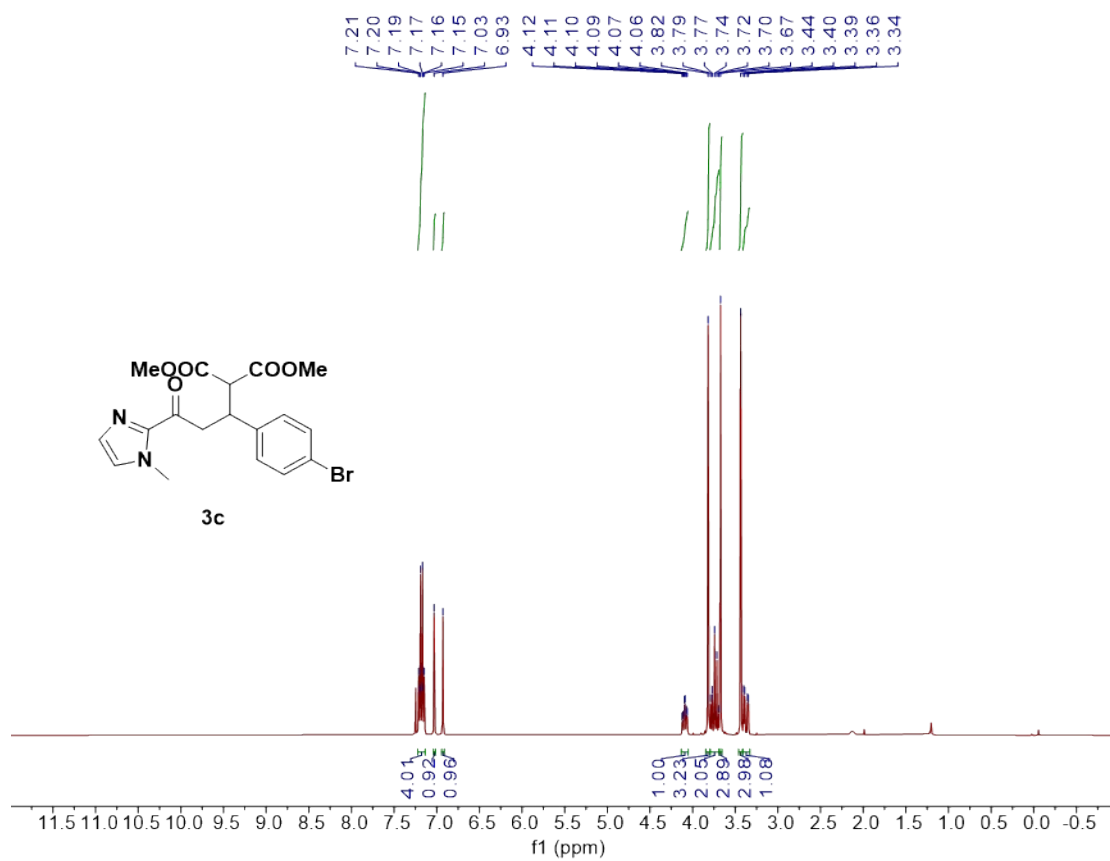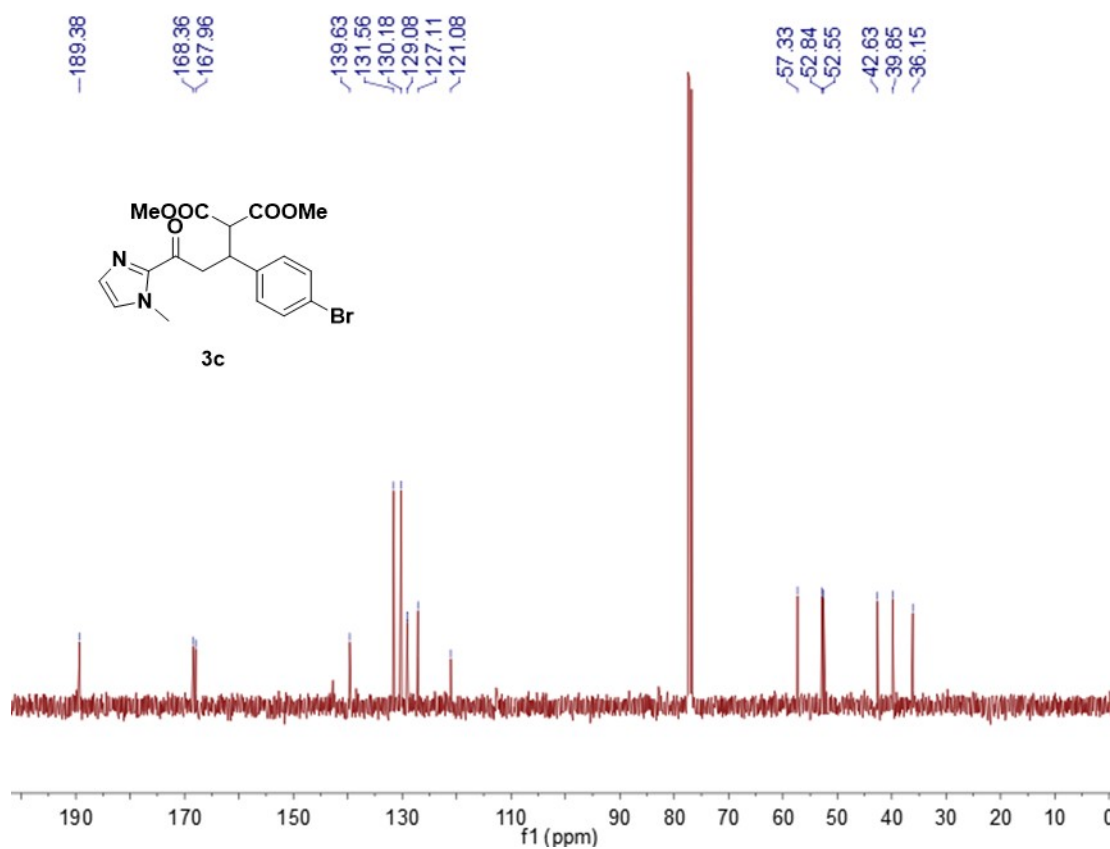

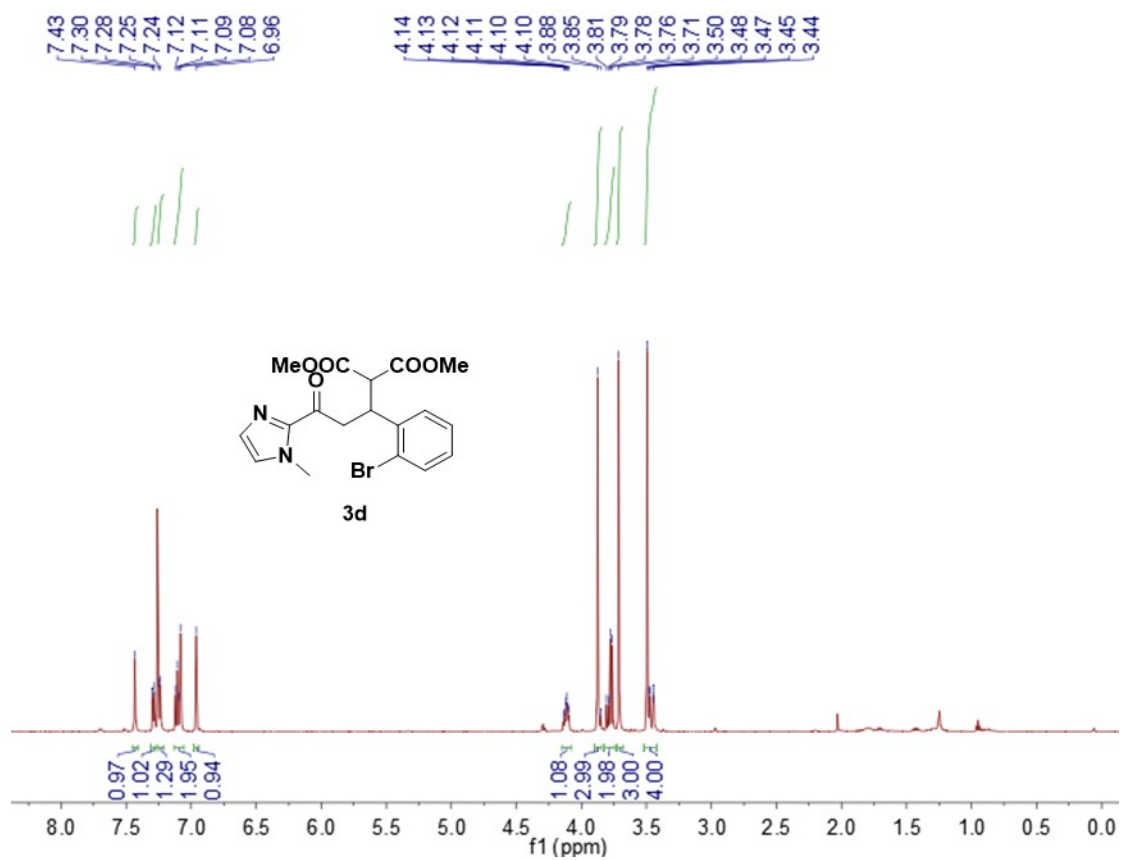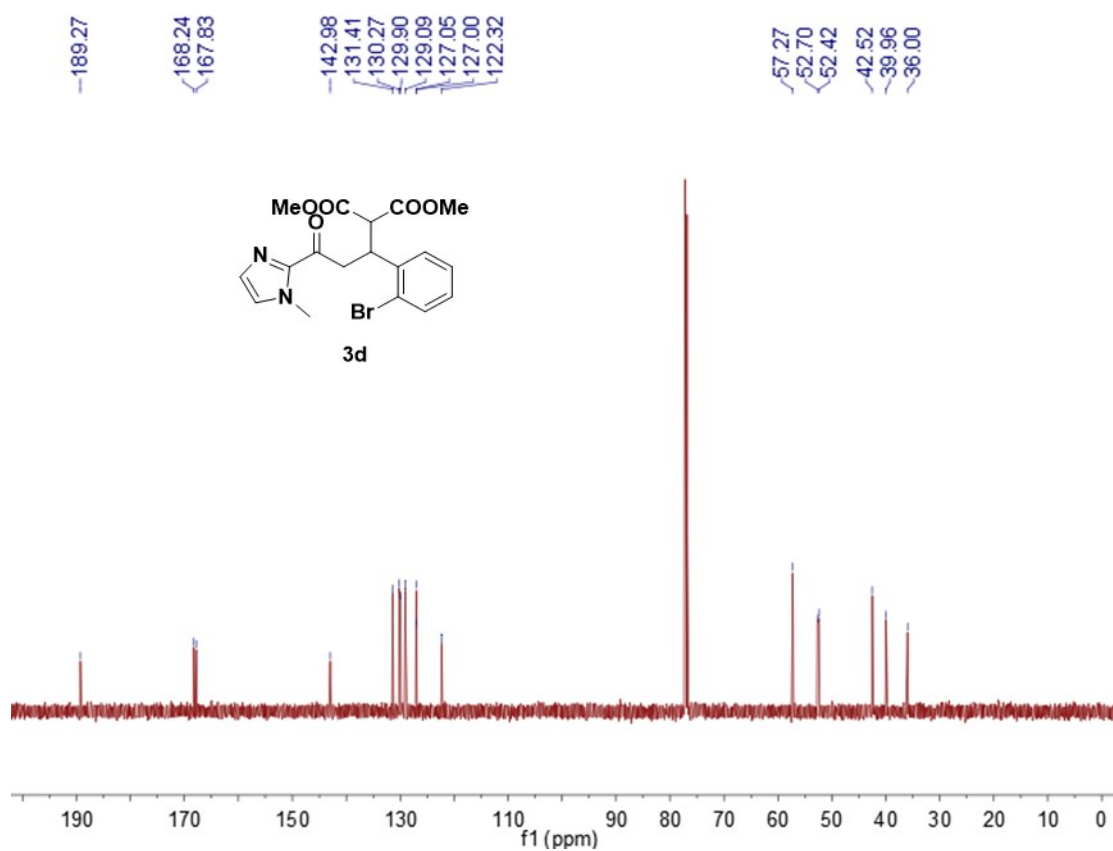

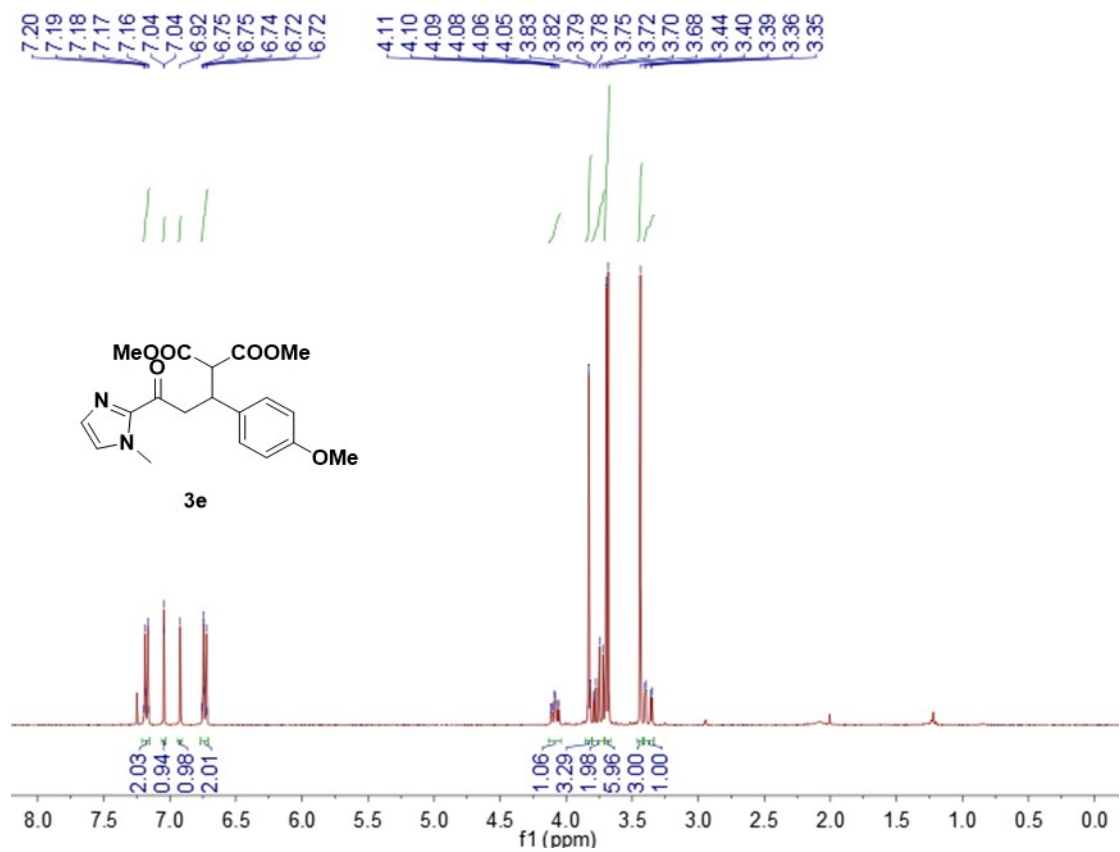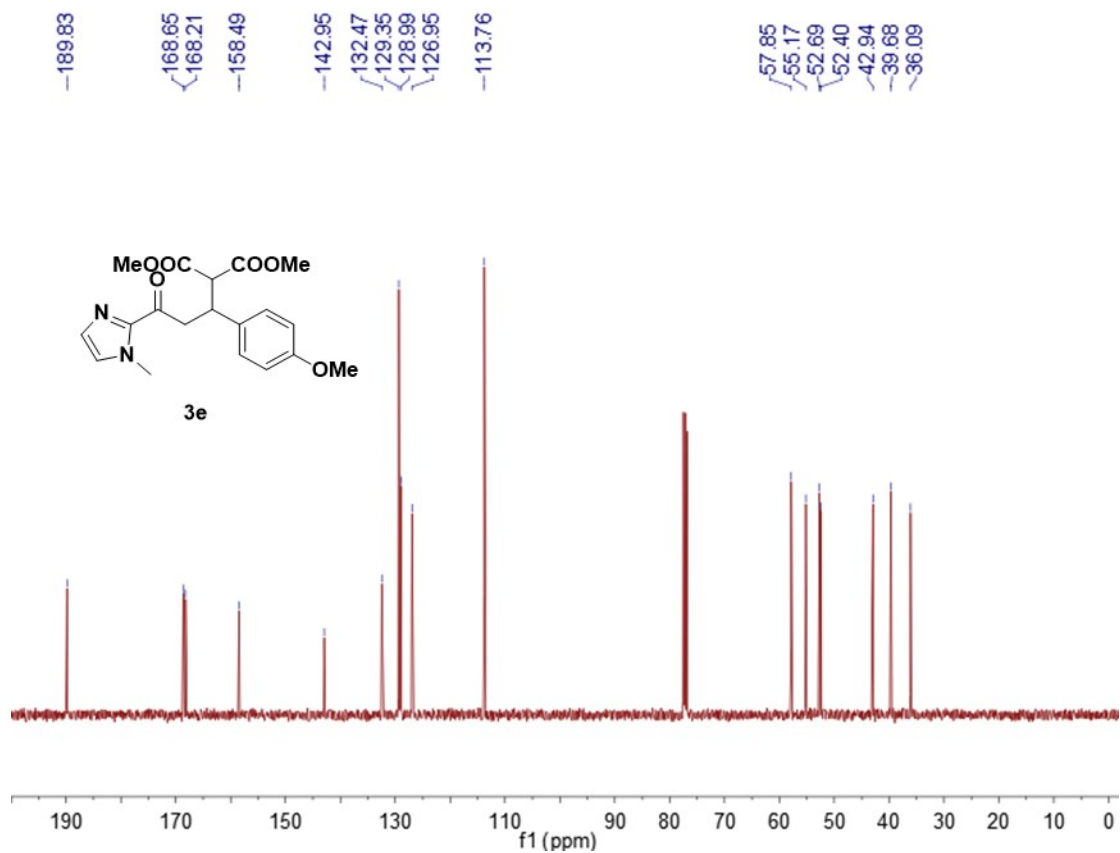

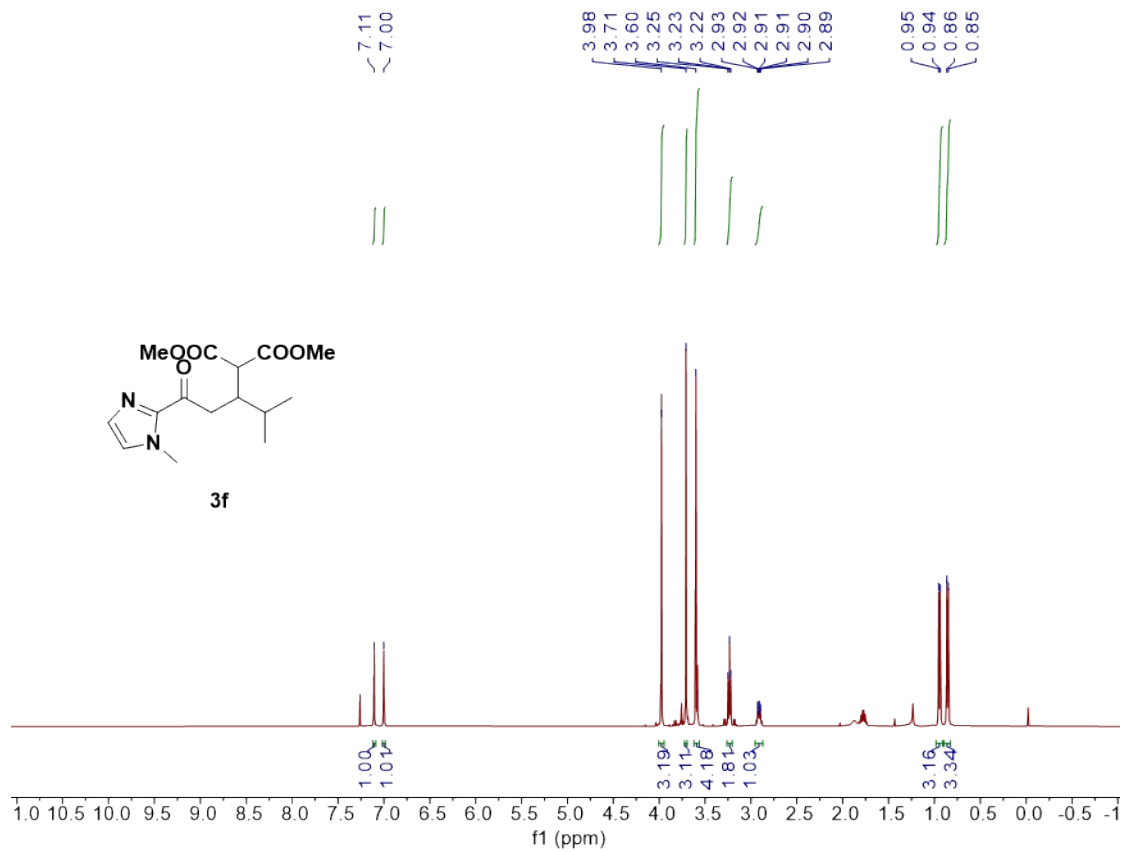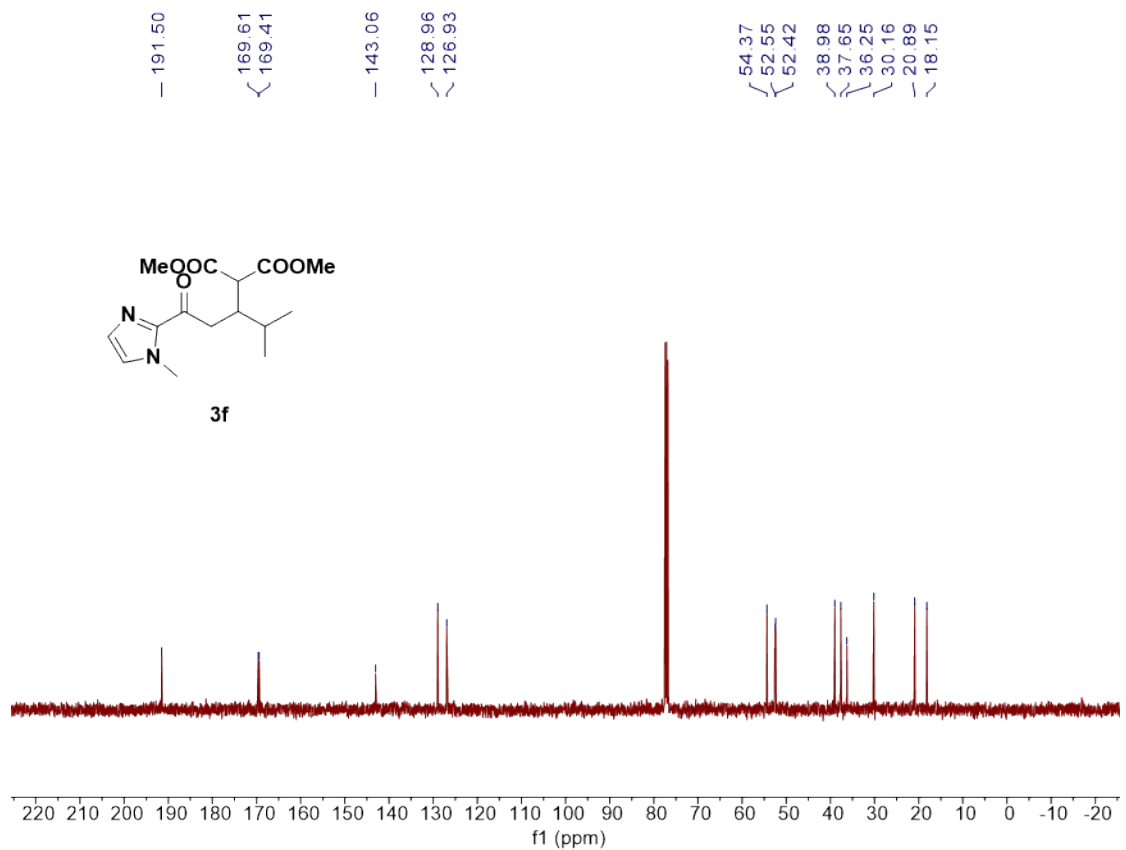

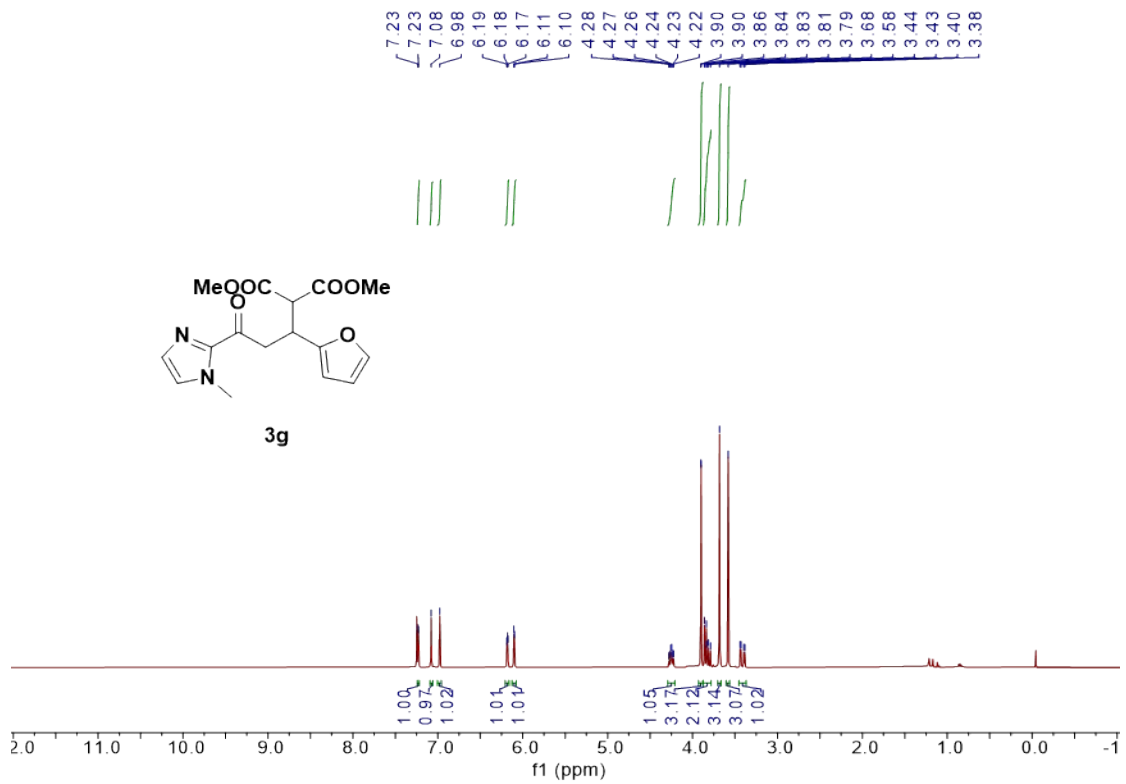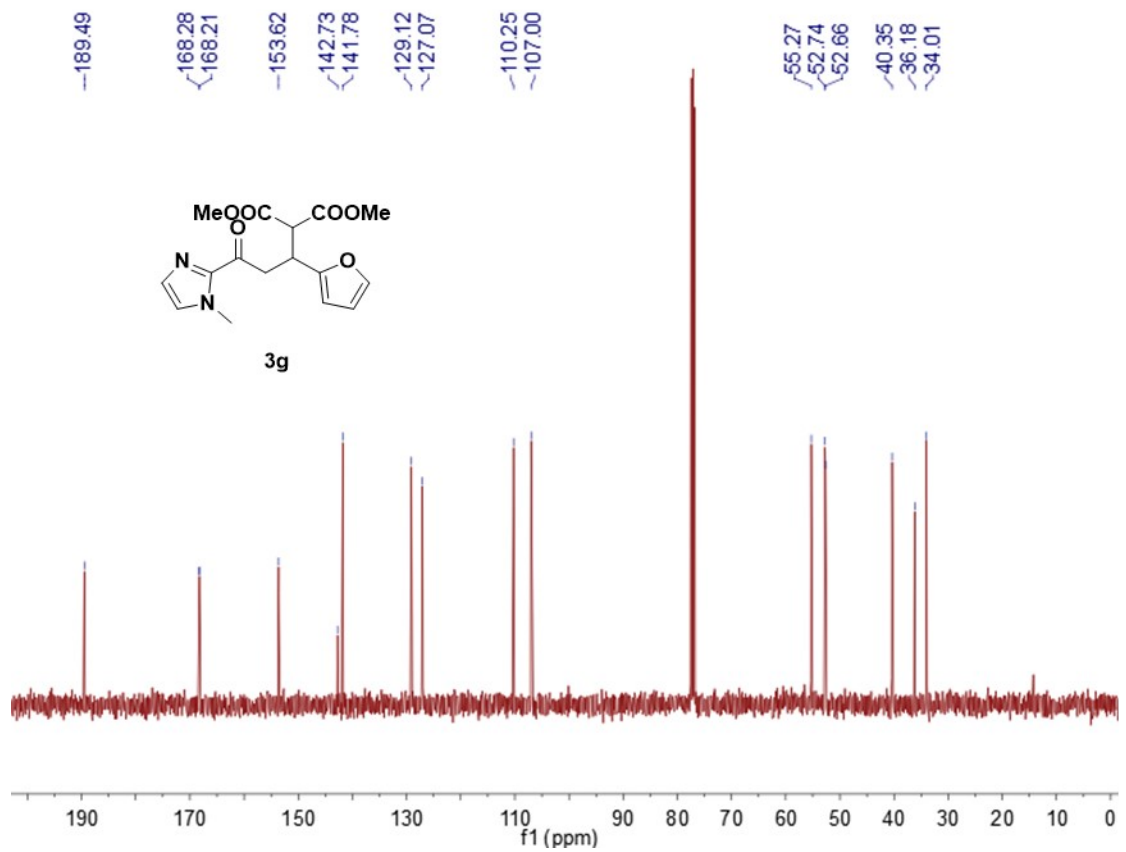

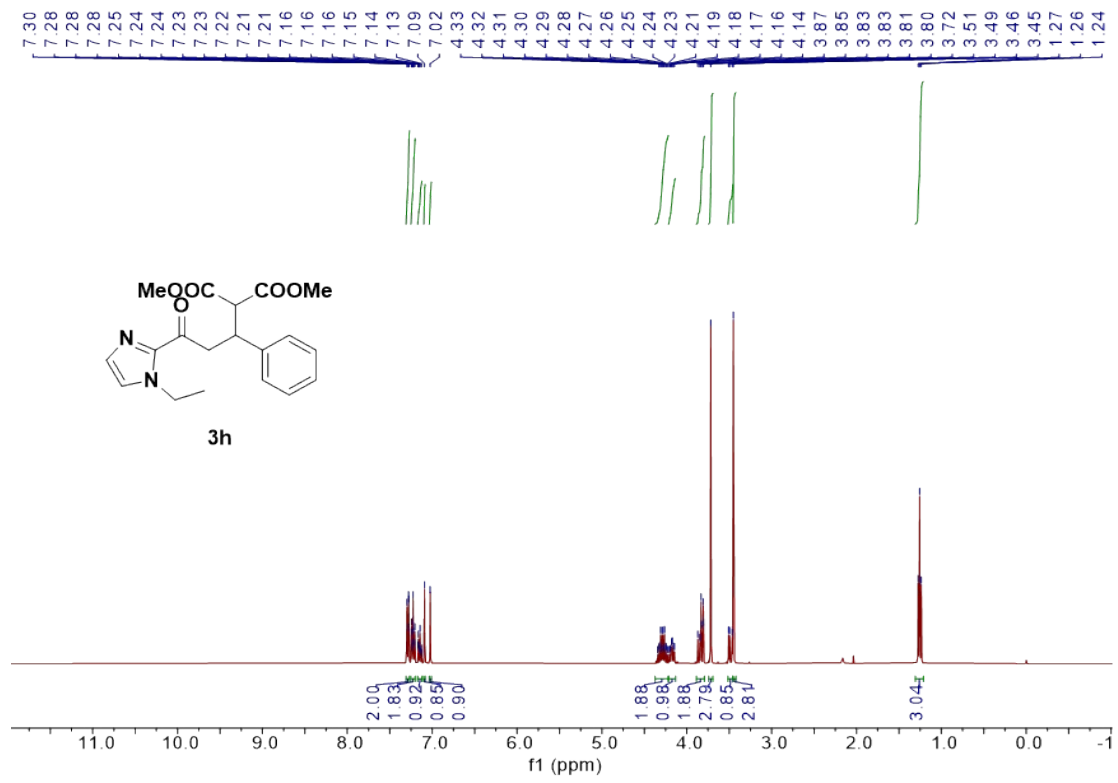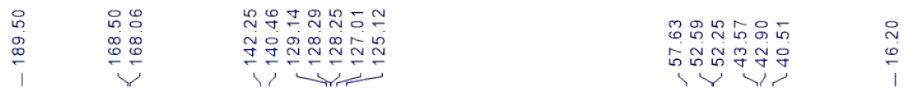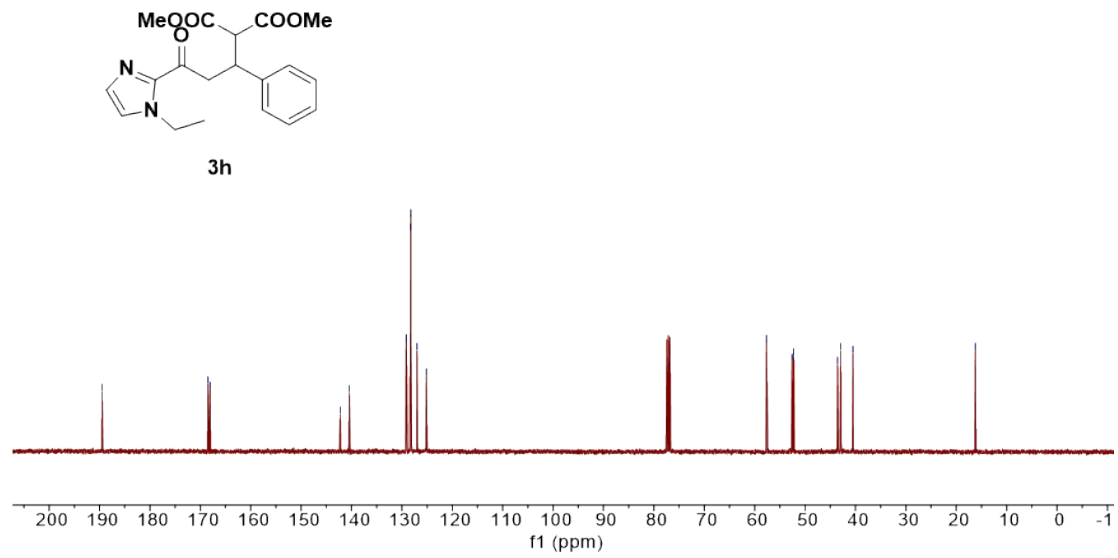

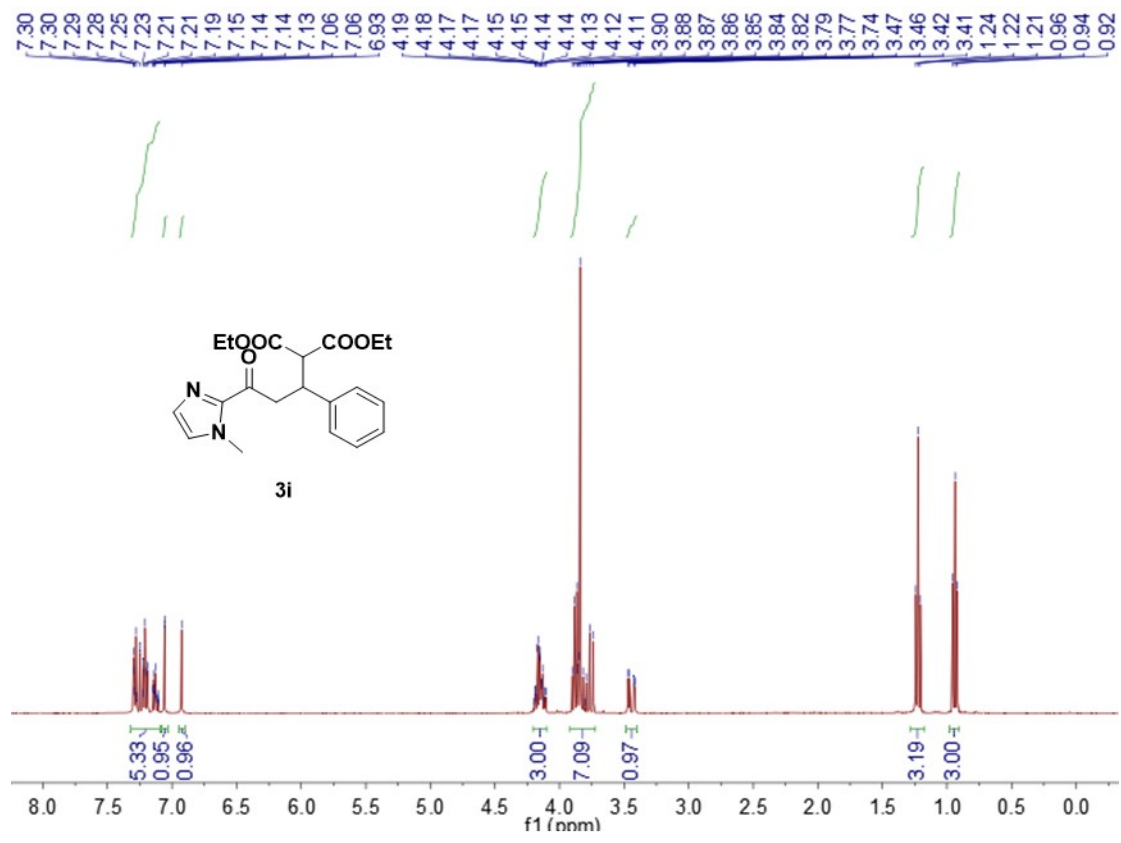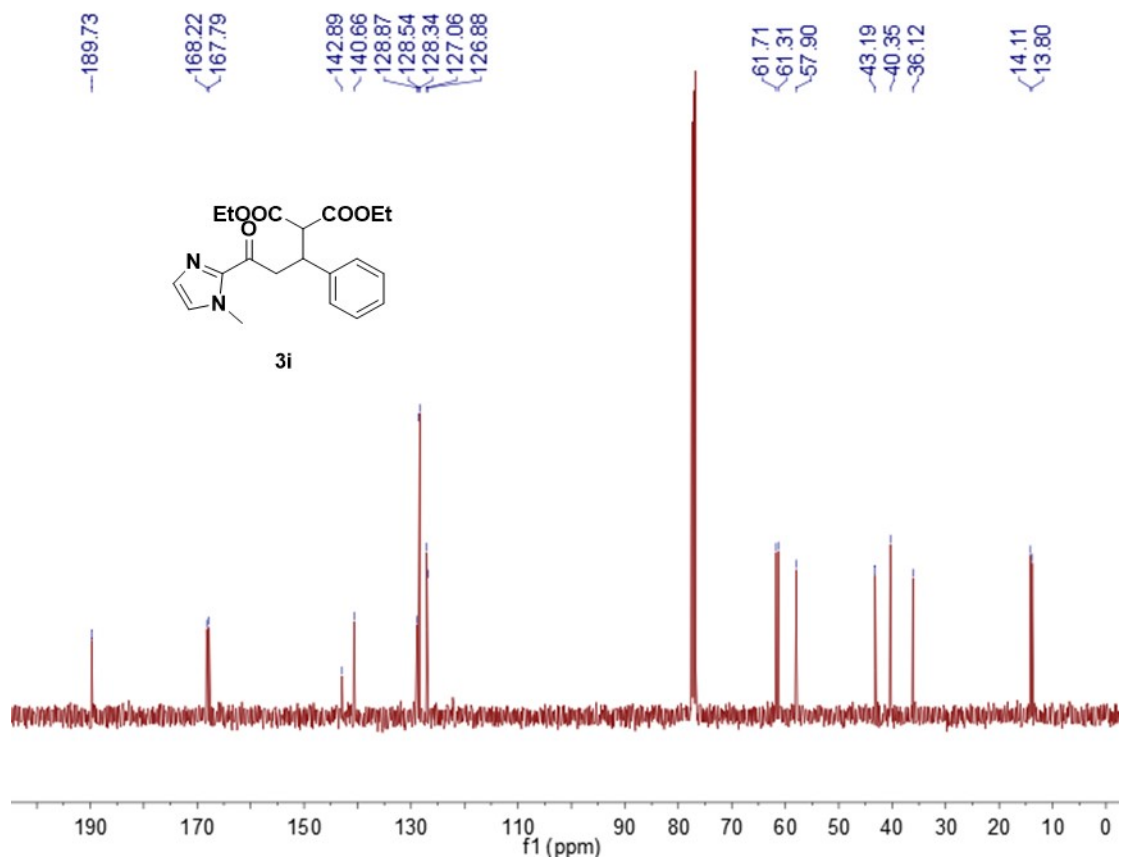

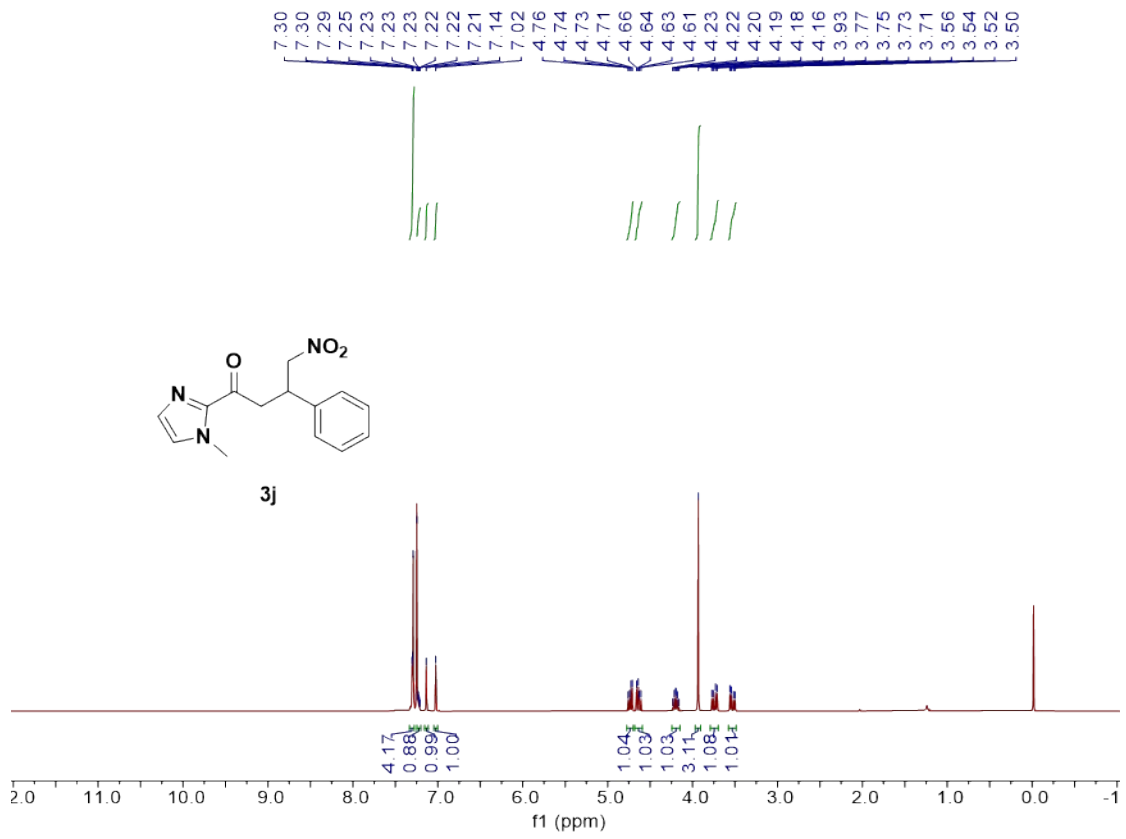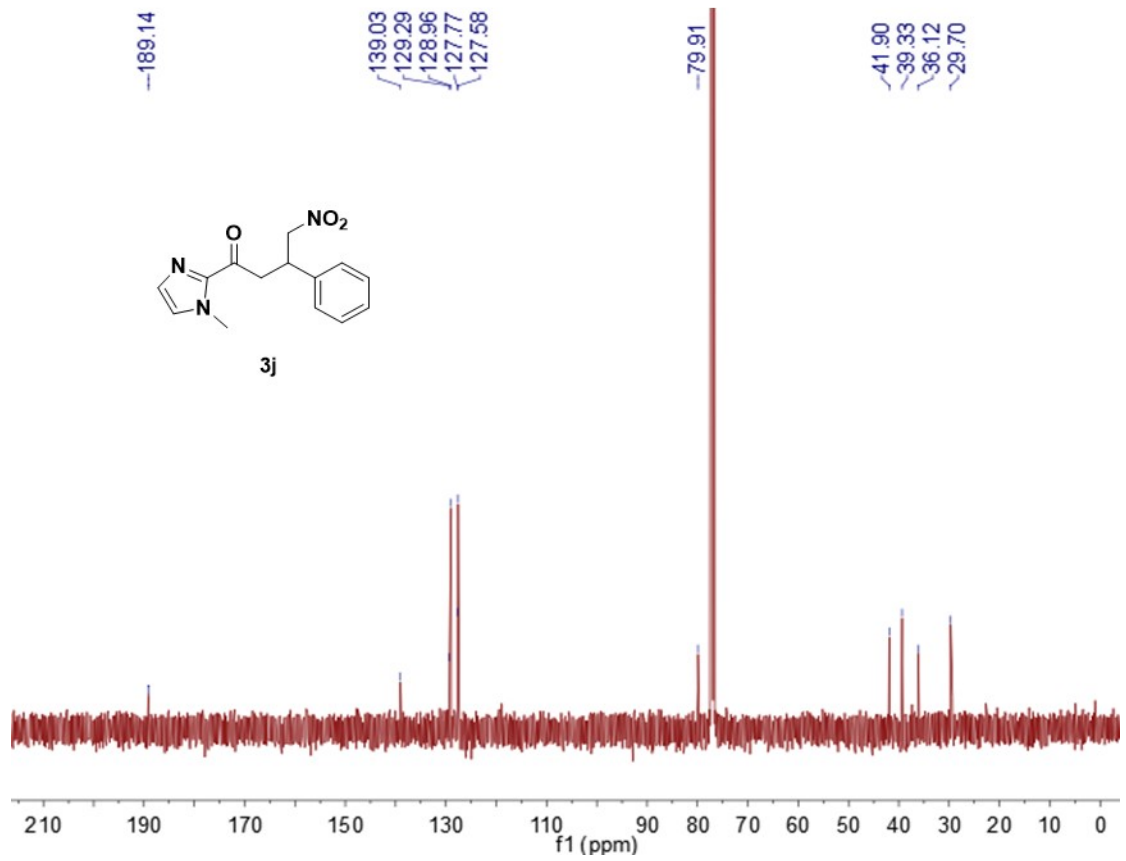



## 8. HPLC traces

### 3a racemate

The ee were determined by chiral-phase HPLC (Daicel chiralpak-AD, hexane/*i*-PrOH 80:20, 1.0 mL/min, 254 nm).

Retention times: 14.9 min and 17.7 min.

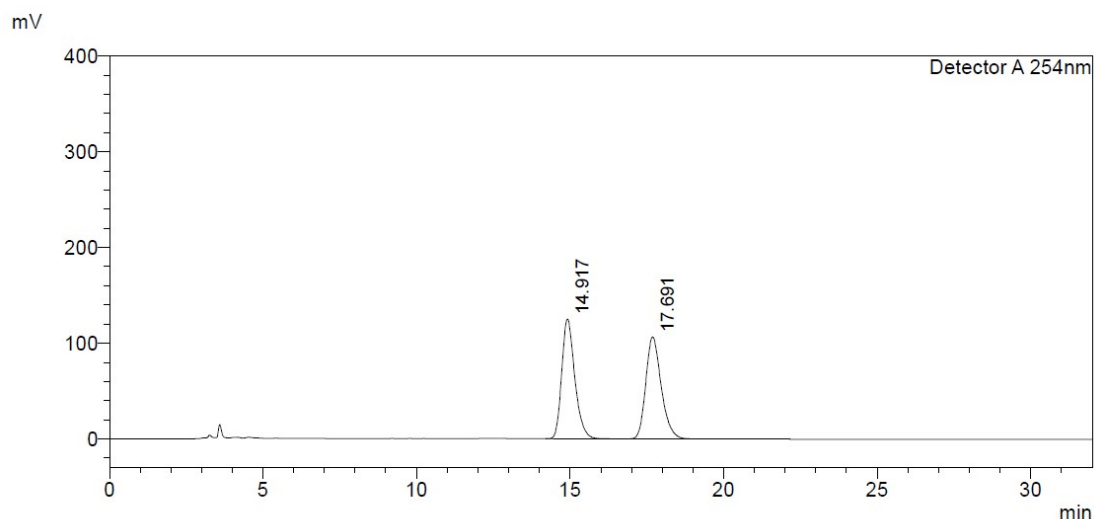

#### <Peak Table>

Detector A 254nm

| Peak# | Ret. Time | Area    | Height | Conc.  | Unit | Mark | Name |
|-------|-----------|---------|--------|--------|------|------|------|
| 1     | 14.917    | 3714146 | 125128 | 49.953 |      |      |      |
| 2     | 17.691    | 3721117 | 106520 | 50.047 |      |      |      |
| Total |           | 7435263 | 231647 |        |      |      |      |

Product **3a** from the enantioselective Michael reaction catalyzed by ATP-Cu(II) catalyst using **1a** in a 0.5 mmol scale (83% ee).

Retention times: 14.8 min and 17.6 min.

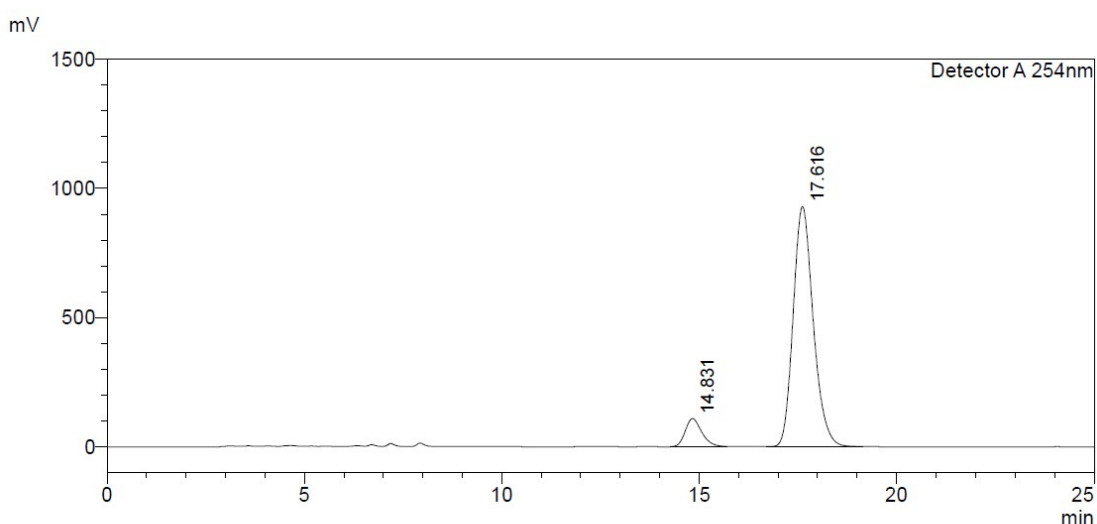

#### <Peak Table>

Detector A 254nm

| Peak# | Ret. Time | Area     | Height  | Conc. | Unit | Mark | Name |
|-------|-----------|----------|---------|-------|------|------|------|
| 1     | 14.831    | 3142245  | 108368  | 0.000 |      | M    |      |
| 2     | 17.616    | 32844655 | 929661  | 0.000 |      | M    |      |
| Total |           | 35986901 | 1038029 |       |      |      |      |

### 3b racemate

The ee were determined by chiral-phase HPLC (Daicel chiralpak-AD, hexane/*i*-PrOH 80:20, 1.0 mL/min, 254 nm).

Retention times: 17.3 min and 20.2 min.

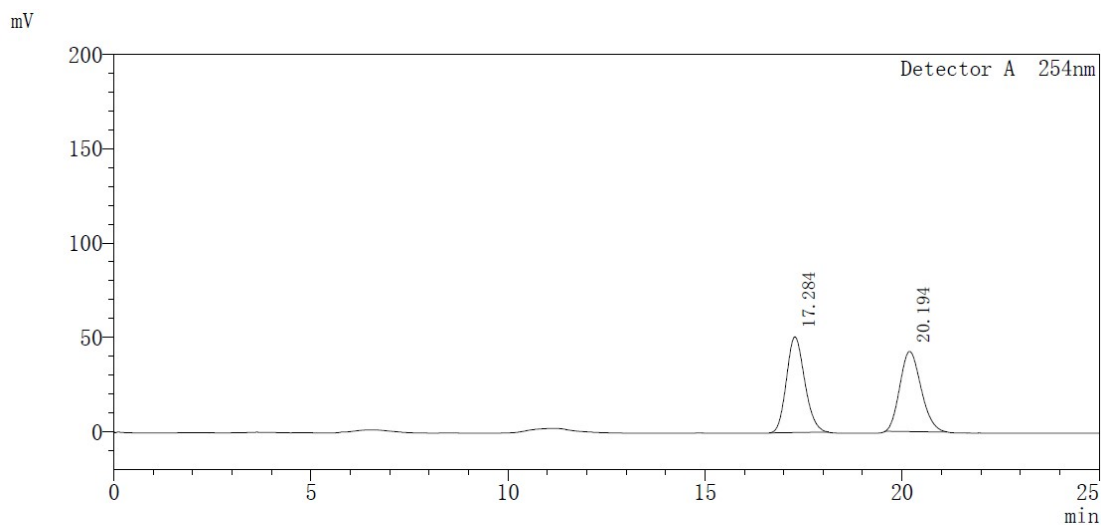

<Peak Table>

| Detector A 254nm |           |         |        |        |      |      |      |
|------------------|-----------|---------|--------|--------|------|------|------|
| Peak#            | Ret. Time | Area    | Height | Conc.  | Unit | Mark | Name |
| 1                | 17.284    | 1636515 | 50706  | 50.737 |      | M    |      |
| 2                | 20.194    | 1588994 | 42456  | 49.263 |      | M    |      |
| Total            |           | 3225509 | 93162  |        |      |      |      |

Product **3b** from the enantioselective Michael reaction catalyzed by ATP-Cu(II) catalyst using **1b** in a 0.1 mmol scale (81% ee).

Retention times: 17.3 min and 20.5 min.

<Chromatogram>

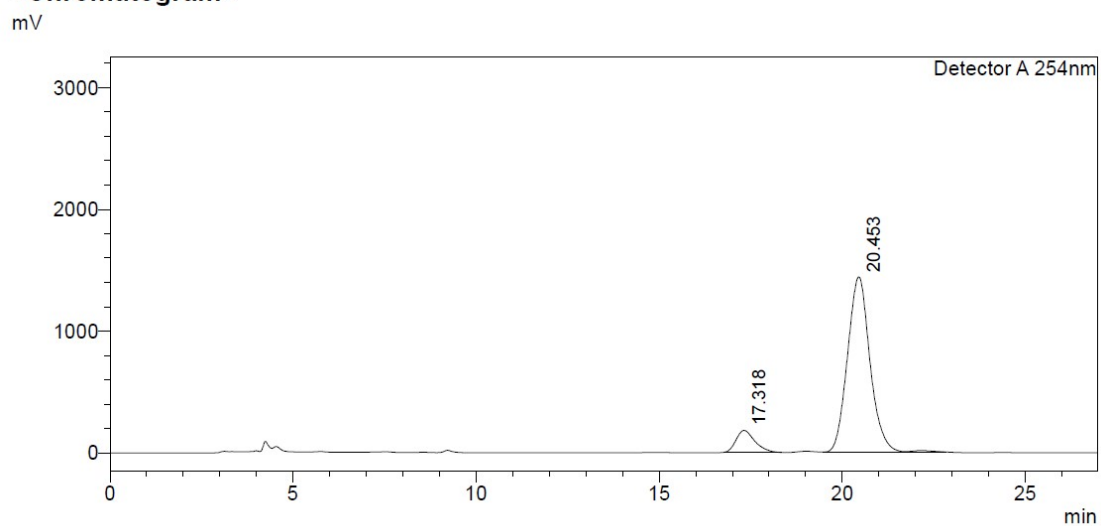

<Peak Table>

| Detector A 254nm |           |          |         |        |      |      |      |
|------------------|-----------|----------|---------|--------|------|------|------|
| Peak#            | Ret. Time | Area     | Height  | Conc.  | Unit | Mark | Name |
| 1                | 17.318    | 6459870  | 180458  | 9.489  |      | M    |      |
| 2                | 20.453    | 61617645 | 1438868 | 90.511 |      | M    |      |
| Total            |           | 68077515 | 1619326 |        |      |      |      |

### 3c racemate

The ee were determined by chiral-phase HPLC (Daicel chiralpak-AD, hexane/*i*-PrOH 80:20, 1.0 mL/min, 254 nm).

Retention times: 18.1 min and 21.1 min.

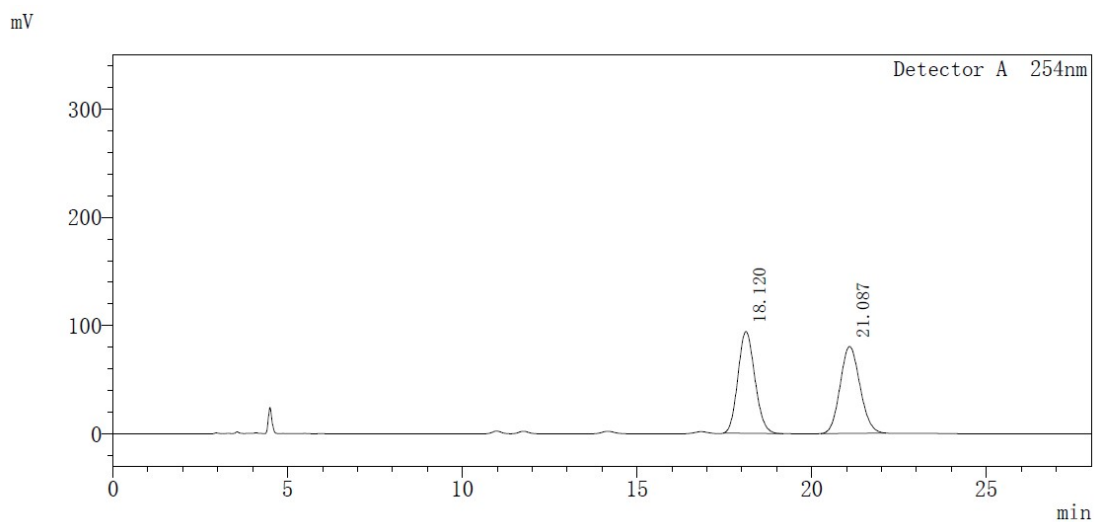

<Peak Table>

| Detector A 254nm |           |         |        |       |      |      |      |
|------------------|-----------|---------|--------|-------|------|------|------|
| Peak#            | Ret. Time | Area    | Height | Conc. | Unit | Mark | Name |
| 1                | 18.120    | 3166447 | 93982  | 0.000 |      | M    |      |
| 2                | 21.087    | 3167019 | 80217  | 0.000 |      | M    |      |
| Total            |           | 6333467 | 174199 |       |      |      |      |

Product **3c** from the enantioselective Michael reaction catalyzed by ATP-Cu(II) catalyst using **1c** in a 0.5 mmol scale (83% ee).

Retention times: 18.7 min and 21.8 min.

<Chromatogram>

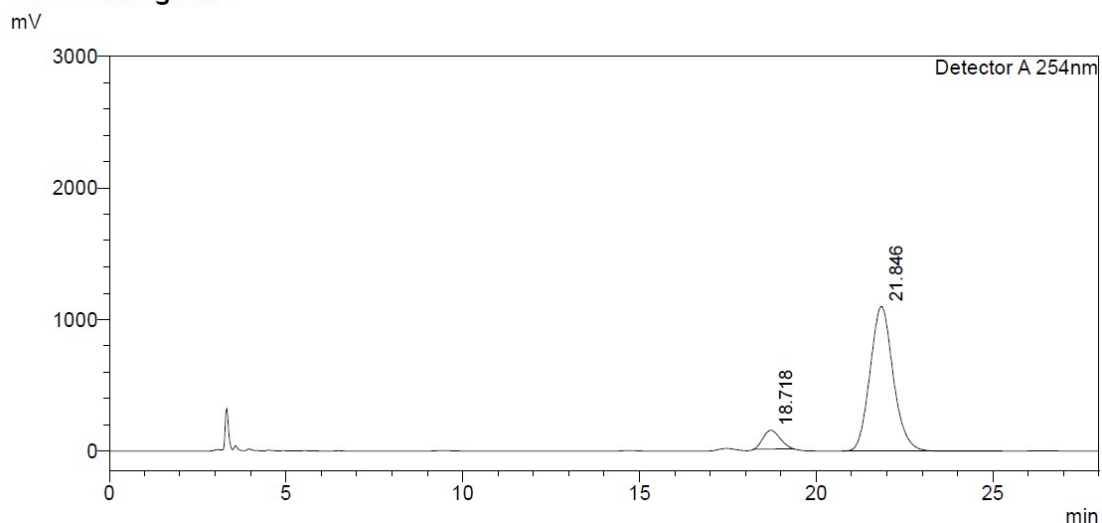

<Peak Table>

| Detector A 254nm |           |          |         |        |      |      |      |
|------------------|-----------|----------|---------|--------|------|------|------|
| Peak#            | Ret. Time | Area     | Height  | Conc.  | Unit | Mark | Name |
| 1                | 18.718    | 4753918  | 142281  | 8.679  |      | M    |      |
| 2                | 21.846    | 50022999 | 1098712 | 91.321 |      | M    |      |
| Total            |           | 54776917 | 1240993 |        |      |      |      |

### 3d racemate

The ee were determined by chiral-phase HPLC (Daicel chiralpak-AD, hexane/*i*-PrOH 80:20, 1.0 mL/min, 254 nm).

Retention times: 14.2 min and 19.3 min.

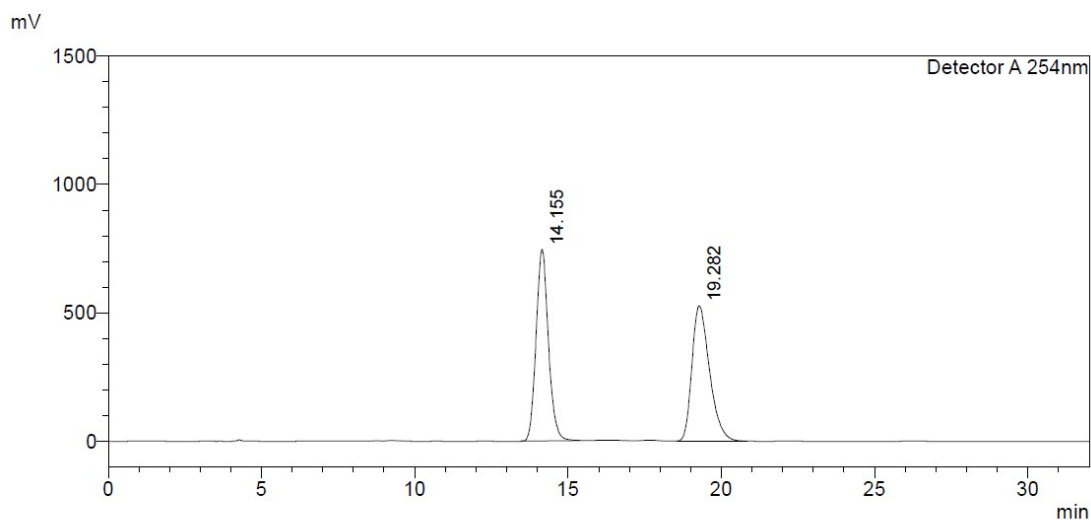

#### <Peak Table>

| Peak# | Ret. Time | Area     | Height  | Conc.  | Unit | Mark | Name |
|-------|-----------|----------|---------|--------|------|------|------|
| 1     | 14.155    | 20855447 | 745233  | 49.789 |      | M    |      |
| 2     | 19.282    | 21032277 | 526221  | 50.211 |      | M    |      |
| Total |           | 41887724 | 1271454 |        |      |      |      |

Product **3d** from the enantioselective Michael reaction catalyzed by ATP-Cu(II) catalyst using **1d** in a 0.1 mmol scale (44% ee).

Retention times: 14.0 min and 19.3 min.

#### <Chromatogram>

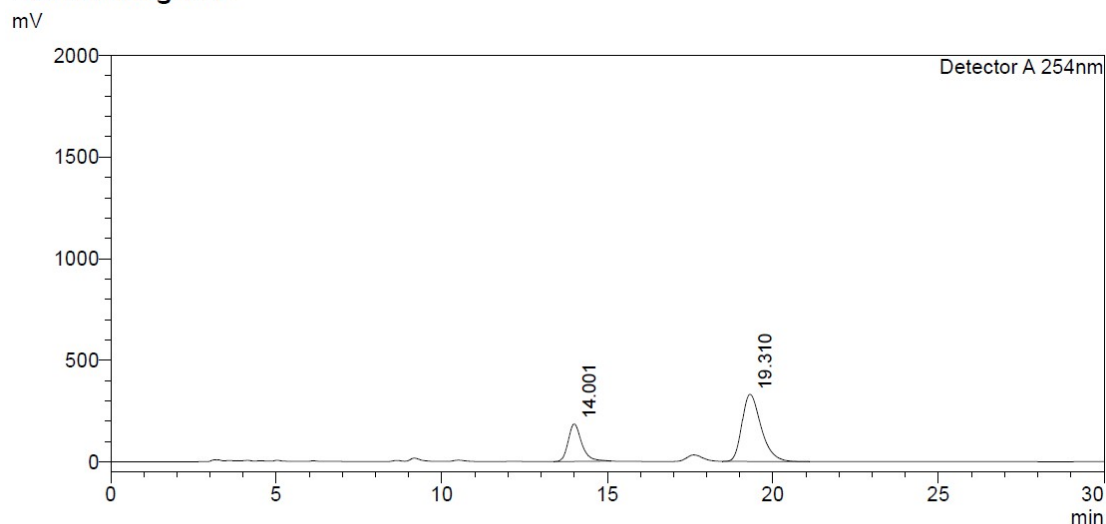

#### <Peak Table>

| Peak# | Ret. Time | Area     | Height | Conc.  | Unit | Mark | Name |
|-------|-----------|----------|--------|--------|------|------|------|
| 1     | 14.001    | 5246579  | 184508 | 28.248 |      | M    |      |
| 2     | 19.310    | 13326511 | 330981 | 71.752 |      | M    |      |
| Total |           | 18573089 | 515489 |        |      |      |      |

### 3e racemate

The ee were determined by chiral-phase HPLC (Daicel chiralpak-AD, hexane/*i*-PrOH 80:20, 1.0 mL/min, 254 nm).

Retention times: 24.4 min and 30.0 min.

#### <Chromatogram>

mV

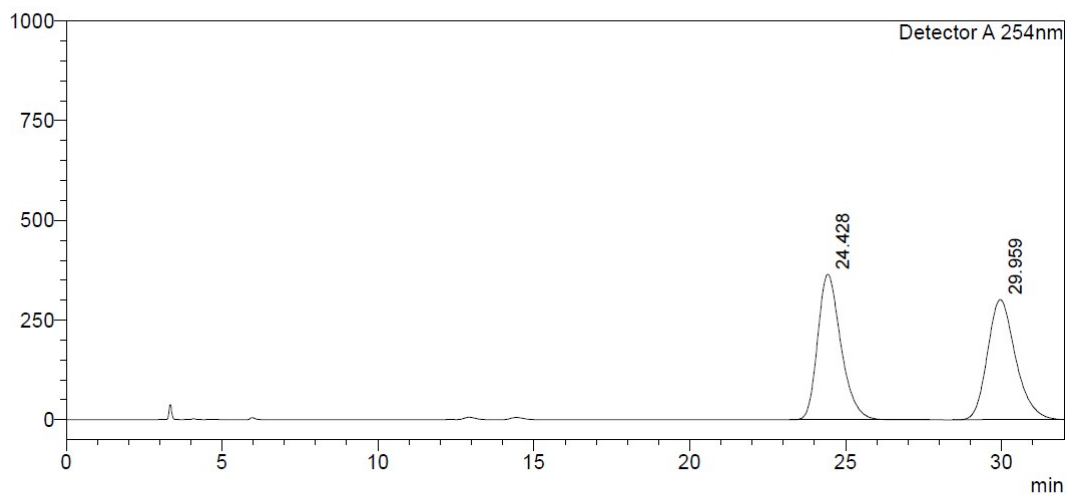

#### <Peak Table>

Detector A 254nm

| Peak# | Ret. Time | Area     | Height | Conc.  | Unit | Mark | Name |
|-------|-----------|----------|--------|--------|------|------|------|
| 1     | 24.428    | 18903008 | 364743 | 50.076 |      |      |      |
| 2     | 29.959    | 18845723 | 301003 | 49.924 |      |      |      |
| Total |           | 37748731 | 665746 |        |      |      |      |

Product 3e from the enantioselective Michael reactions catalyzed by ATP-Cu(II) catalyst using 1e in a 0.5 mmol scale (83% ee).

Retention times: 24.3 min and 30.0 min.

#### <Chromatogram>

mV

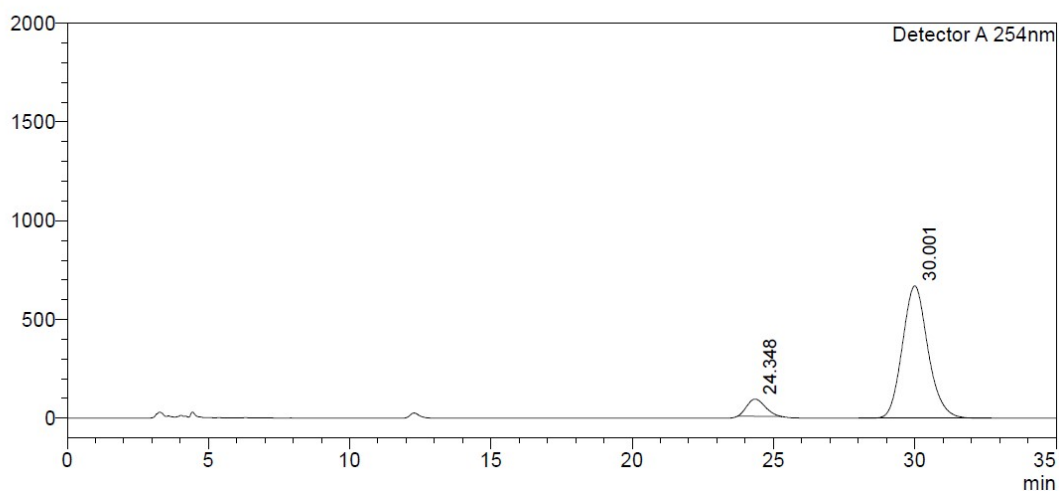

#### <Peak Table>

Detector A 254nm

| Peak# | Ret. Time | Area     | Height | Conc.  | Unit | Mark | Name |
|-------|-----------|----------|--------|--------|------|------|------|
| 1     | 24.348    | 3913978  | 87168  | 8.498  |      | M    |      |
| 2     | 30.001    | 42144975 | 669604 | 91.502 |      | M    |      |
| Total |           | 46058953 | 756772 |        |      |      |      |

### 3f racemate

The ee were determined by chiral-phase HPLC (Daicel chiralpak-AD, hexane/*i*-PrOH 95:5, 1.0 mL/min, 254 nm).

Retention times: 20.3 min and 25.3 min.

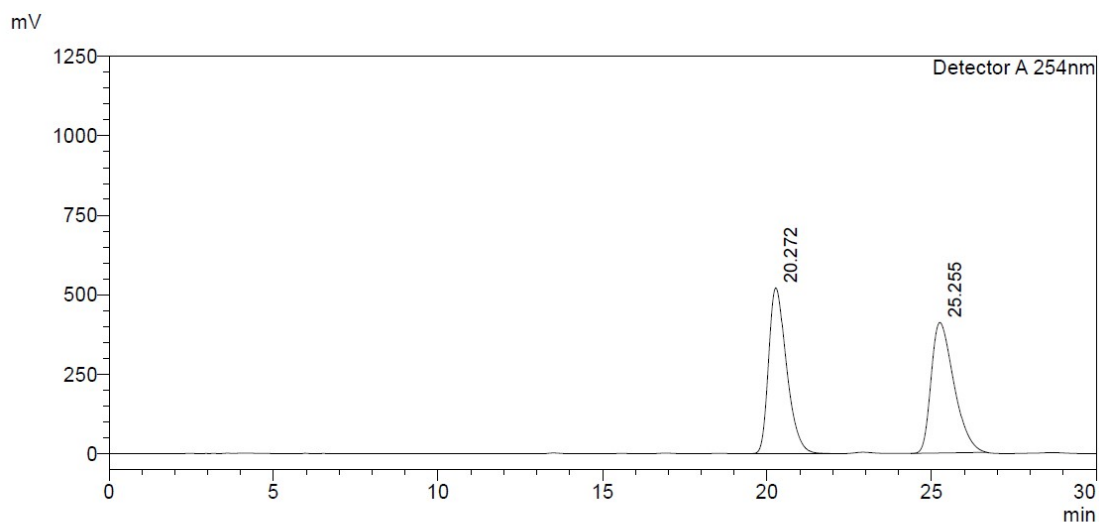

#### <Peak Table>

Detector A 254nm

| Peak# | Ret. Time | Area     | Height | Conc.  | Unit | Mark | Name |
|-------|-----------|----------|--------|--------|------|------|------|
| 1     | 20.272    | 19775133 | 521163 | 49.823 |      | M    |      |
| 2     | 25.255    | 19915983 | 410648 | 50.177 |      | M    |      |
| Total |           | 39691117 | 931810 |        |      |      |      |

Product **3f** from the enantioselective Michael reactions catalyzed by ATP-Cu(II) catalyst using **1f** in a 0.1 mmol scale (3% ee).

Retention times: 20.2 min and 25.1 min.

#### <Chromatogram>

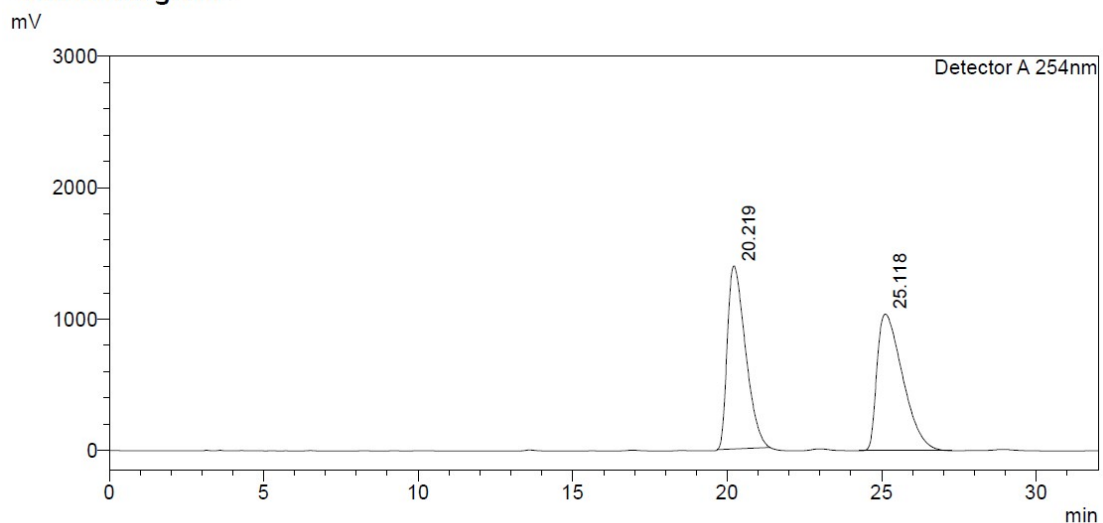

#### <Peak Table>

Detector A 254nm

| Peak# | Ret. Time | Area      | Height  | Conc.  | Unit | Mark | Name |
|-------|-----------|-----------|---------|--------|------|------|------|
| 1     | 20.219    | 57019400  | 1391921 | 48.663 |      | M    |      |
| 2     | 25.118    | 60153242  | 1039830 | 51.337 |      | M    |      |
| Total |           | 117172642 | 2431751 |        |      |      |      |

### 3g racemate

The ee were determined by chiral-phase HPLC (Daicel chiralpak-AD, hexane/*i*-PrOH 80:20, 1.0 mL/min, 254 nm).

Retention times: 15.4 min and 17.1 min.

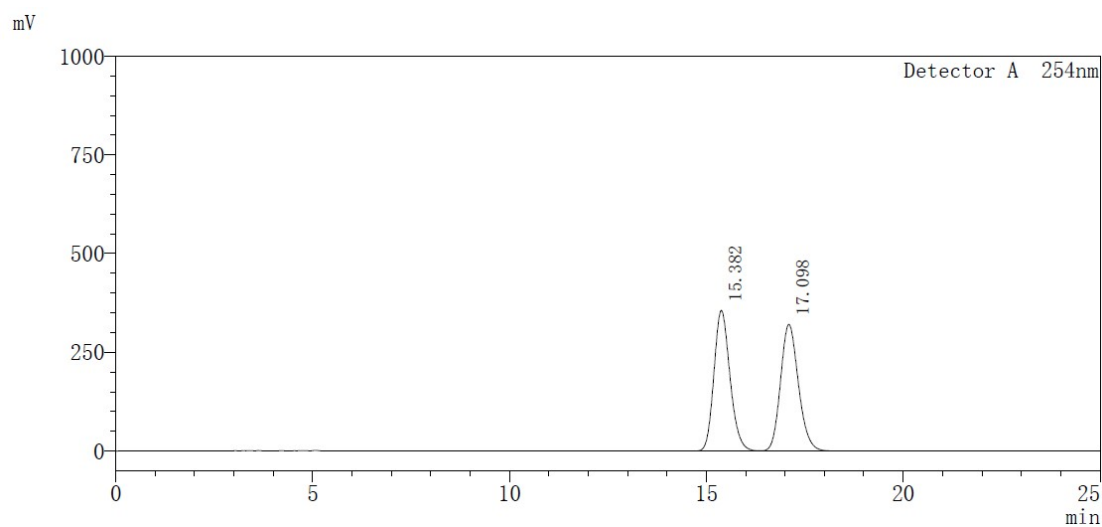

#### <Peak Table>

| Peak# | Ret. Time | Area     | Height | Conc.  | Unit | Mark | Name |
|-------|-----------|----------|--------|--------|------|------|------|
| 1     | 15.382    | 10096928 | 355861 | 49.999 |      | M    |      |
| 2     | 17.098    | 10097318 | 320464 | 50.001 |      | V M  |      |
| Total |           | 20194246 | 676325 |        |      |      |      |

Product **3g** from the enantioselective Michael reaction catalyzed by ATP-Cu(II) catalyst using **1g** in a 0.1 mmol scale (61% ee).

Retention times: 15.3 min and 17.1 min.

#### <Chromatogram>

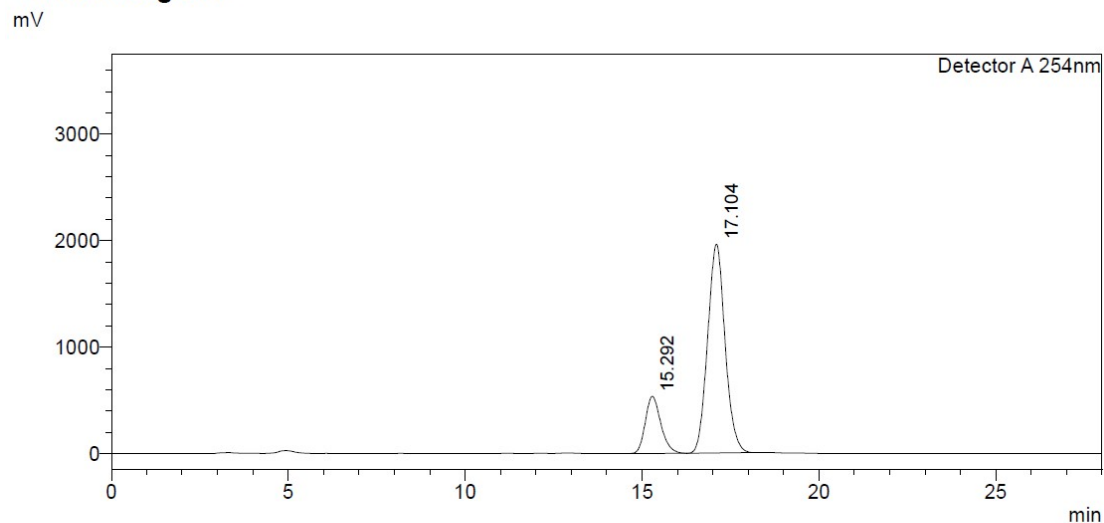

#### <Peak Table>

| Peak# | Ret. Time | Area     | Height  | Conc.  | Unit | Mark | Name |
|-------|-----------|----------|---------|--------|------|------|------|
| 1     | 15.292    | 16343143 | 536656  | 19.544 |      | M    |      |
| 2     | 17.104    | 67280192 | 1960423 | 80.456 |      | M    |      |
| Total |           | 83623334 | 2497079 |        |      |      |      |

### 3h racemate

The ee were determined by chiral-phase HPLC (Daicel chiralpak-ODH, hexane/*i*-PrOH 95:5, 1.0 mL/min, 254 nm).

Retention times: 24.2 min and 38.5 min.

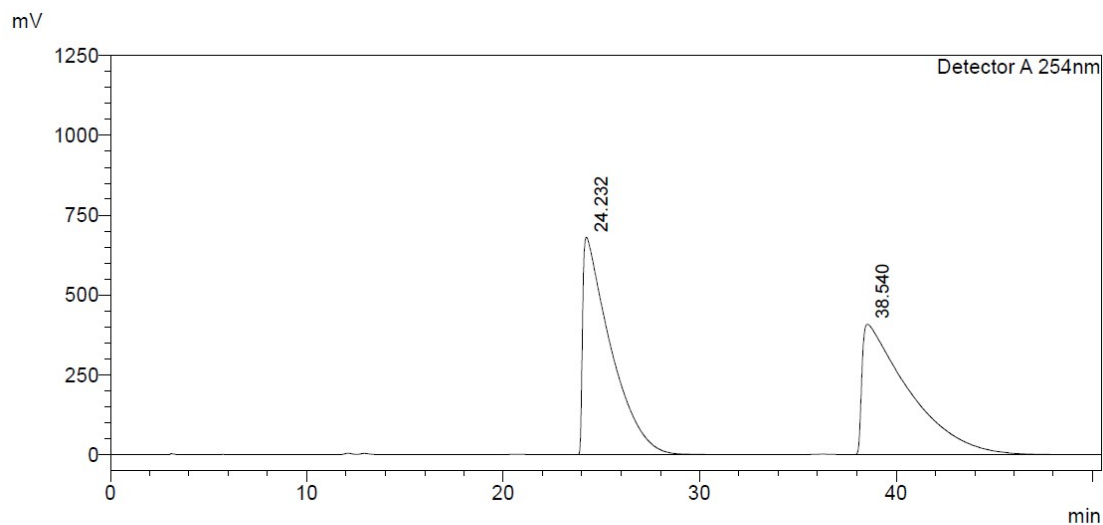

#### <Peak Table>

| Detector A 254nm |           |           |         |        |      |      |      |
|------------------|-----------|-----------|---------|--------|------|------|------|
| Peak#            | Ret. Time | Area      | Height  | Conc.  | Unit | Mark | Name |
| 1                | 24.232    | 66874472  | 681126  | 49.761 |      | M    |      |
| 2                | 38.540    | 67516213  | 408577  | 50.239 |      | M    |      |
| Total            |           | 134390685 | 1089704 |        |      |      |      |

Product **3h** from the enantioselective Michael reaction catalyzed by ATP-Cu(II) catalyst using **1h** in a 0.1 mmol scale (75% ee).

Retention times: 26.2 min and 38.9 min.

#### <Chromatogram>

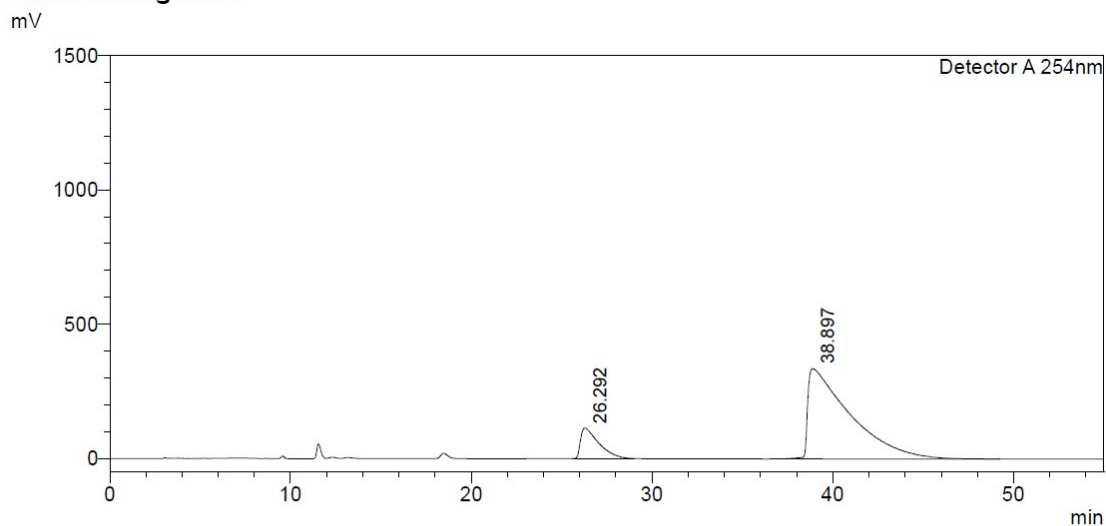

#### <Peak Table>

| Detector A 254nm |           |          |        |        |      |      |      |
|------------------|-----------|----------|--------|--------|------|------|------|
| Peak#            | Ret. Time | Area     | Height | Conc.  | Unit | Mark | Name |
| 1                | 26.292    | 7946610  | 113957 | 12.669 |      | M    |      |
| 2                | 38.897    | 54779826 | 336001 | 87.331 |      | M    |      |
| Total            |           | 62726437 | 449958 |        |      |      |      |



### 3i racemate

The ee were determined by chiral-phase HPLC (Daicel chiralpak-AD, hexane/*i*-PrOH 90:10, 0.5 mL/min, 254 nm).

Retention times: 60.0 min and 64.9 min.

#### <Chromatogram>

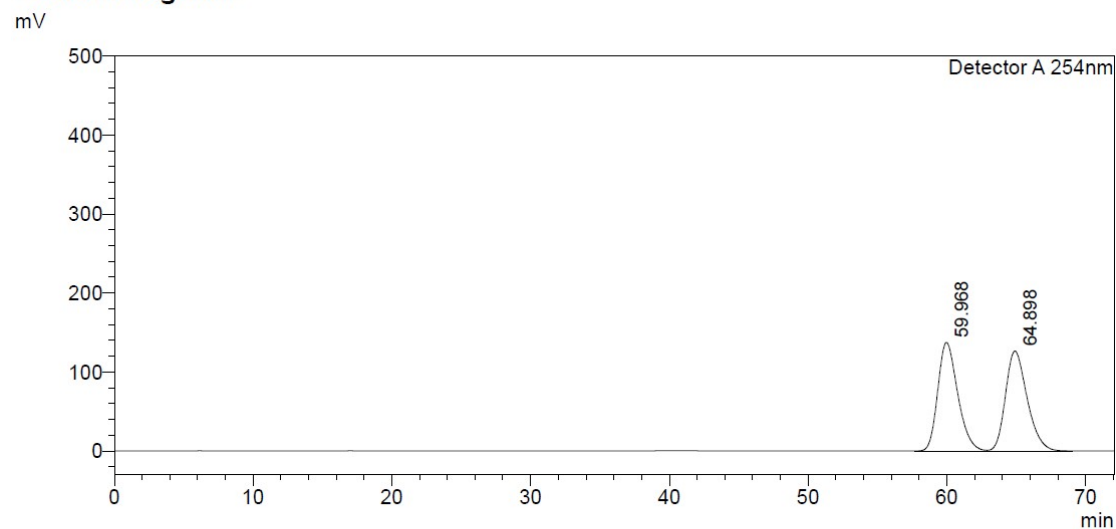

#### <Peak Table>

| Detector A 254nm |           |          |        |        |      |      |      |
|------------------|-----------|----------|--------|--------|------|------|------|
| Peak#            | Ret. Time | Area     | Height | Conc.  | Unit | Mark | Name |
| 1                | 59.968    | 13740774 | 137407 | 49.971 |      |      |      |
| 2                | 64.898    | 13756745 | 126508 | 50.029 |      | V    |      |
| Total            |           | 27497519 | 263916 |        |      |      |      |

Product **3i** from the enantioselective Michael reaction catalyzed by ATP-Cu(II) catalyst using **1a** in a 0.1 mmol scale (80% ee).

Retention times: 59.3 min and 63.3 min.

#### <Chromatogram>

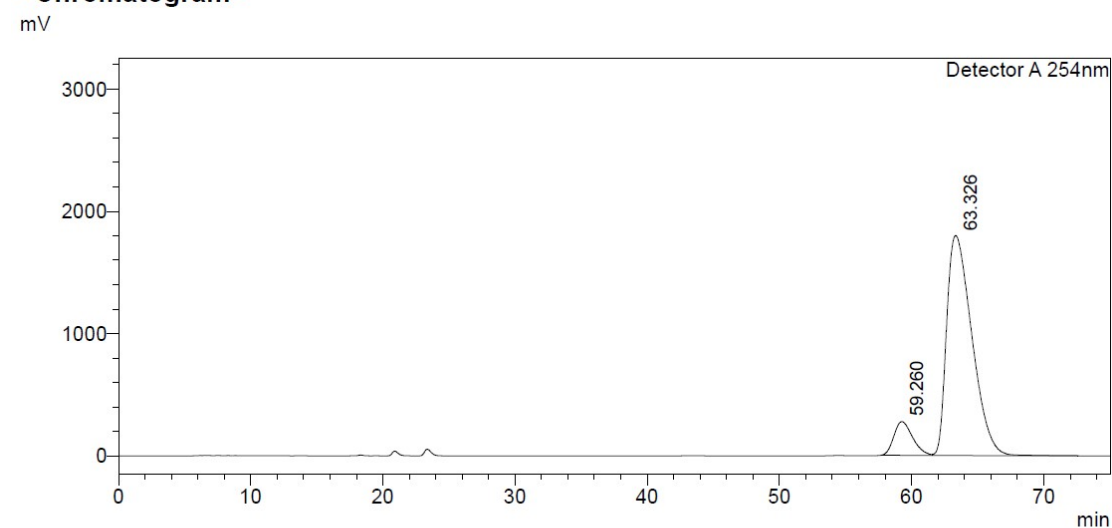

#### <Peak Table>

| Detector A 254nm |           |           |         |        |      |      |      |
|------------------|-----------|-----------|---------|--------|------|------|------|
| Peak#            | Ret. Time | Area      | Height  | Conc.  | Unit | Mark | Name |
| 1                | 59.260    | 27004652  | 275689  | 10.158 |      | M    |      |
| 2                | 63.326    | 238832474 | 1798483 | 89.842 |      | V M  |      |
| Total            |           | 265837126 | 2074172 |        |      |      |      |

### 3j racemate

The ee were determined by chiral-phase HPLC (Daicel chiralpak-AD, hexane/*i*-PrOH 95:5, 1.0 mL/min, 254 nm).

Retention times: 36.7 min and 48.8 min.

#### <Chromatogram>

mV

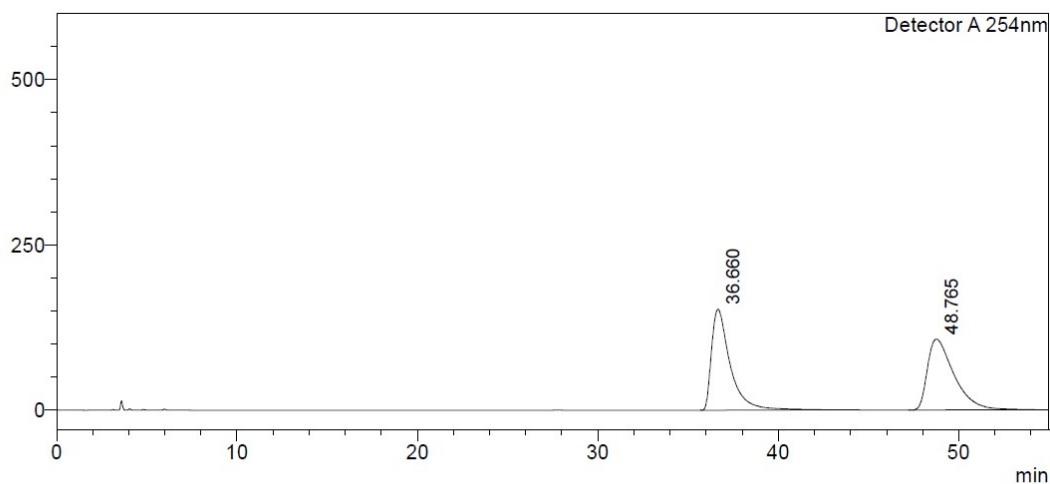

#### <Peak Table>

Detector A 254nm

| Peak# | Ret. Time | Area     | Height | Conc.  | Unit | Mark | Name |
|-------|-----------|----------|--------|--------|------|------|------|
| 1     | 36.660    | 11013399 | 152793 | 49.944 |      | M    |      |
| 2     | 48.765    | 11038284 | 107356 | 50.056 |      | M    |      |
| Total |           | 22051683 | 260149 |        |      |      |      |

Product **3j** from the enantioselective Michael reaction catalyzed by ATP-Cu(II) catalyst using **1a** in a 0.1 mmol scale (77% ee).

Retention times: 36.6 min and 48.2 min.

#### <Chromatogram>

mV

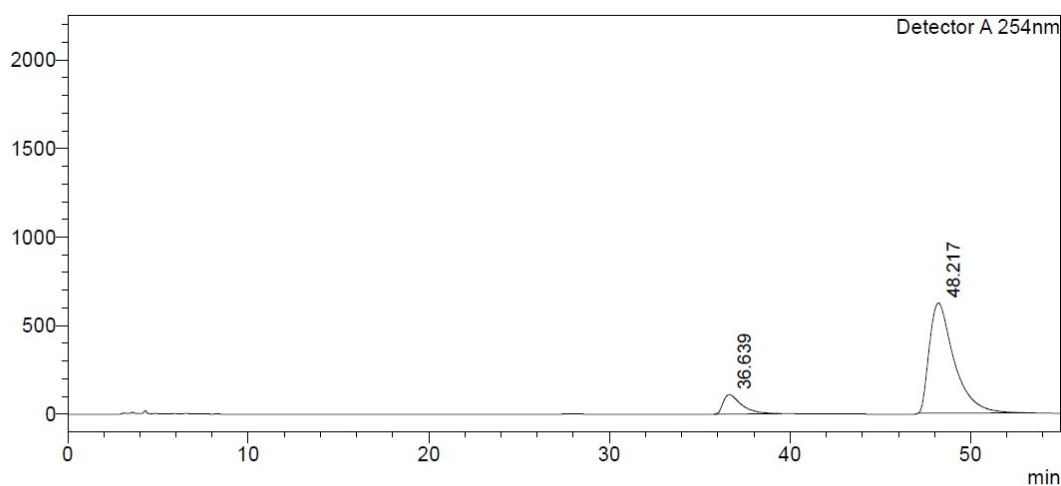

#### <Peak Table>

Detector A 254nm

| Peak# | Ret. Time | Area     | Height | Conc.  | Unit | Mark | Name |
|-------|-----------|----------|--------|--------|------|------|------|
| 1     | 36.639    | 7719177  | 109352 | 11.482 |      | M    |      |
| 2     | 48.217    | 59509963 | 621217 | 88.518 |      | M    |      |
| Total |           | 67229140 | 730569 |        |      |      |      |
